# Supplementary material for: A CO2 sensing module modulates β-1,3-glucan exposure in Candida albicans
Source: PubMed Central journal article supplement (PMC10865862; doi:10.1128/mbio.01898-23), 2024-01-23
Supplement: mbio.01898-23-s0004.pdf [file mbio.01898-23-s0004.pdf]

## Supplementary Figure 4

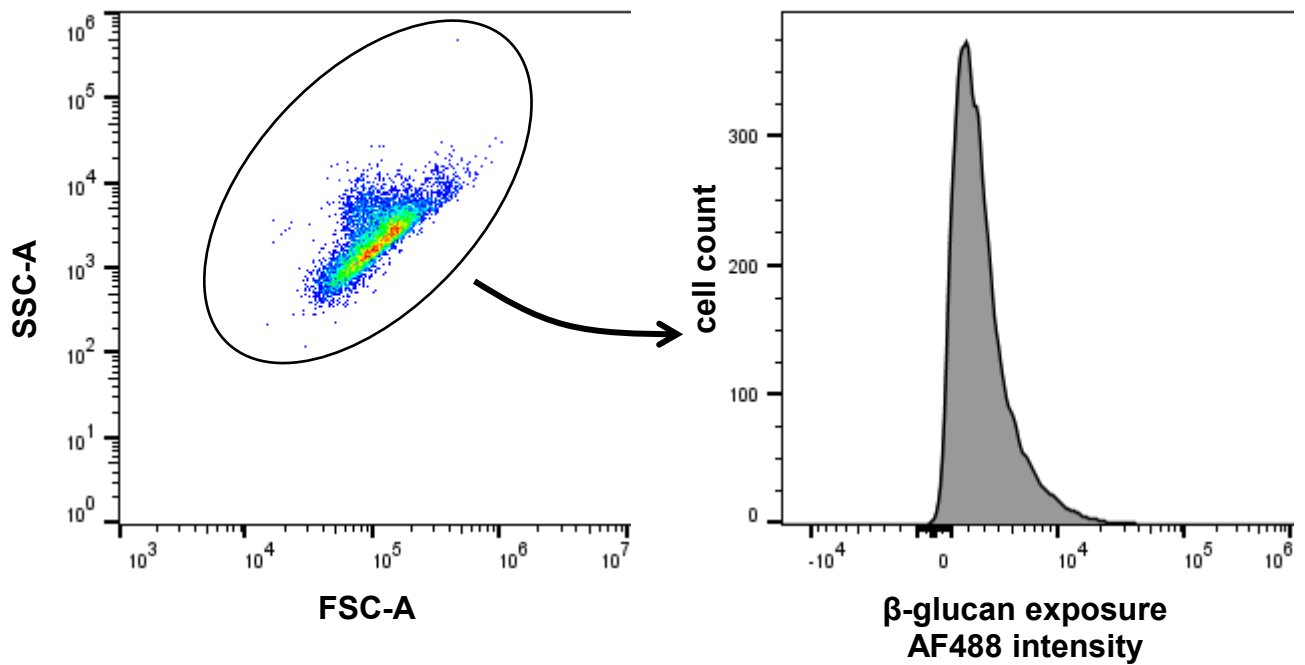

**Supplementary Figure S4. Gating strategy for flow cytometry experiments.** In all flow cytometry experiments, the *C. albicans* populations were gated on the basis of the scatter plot (FSC/SSC). The AF488 intensity of this gated population was then analysed. All the figures in the paper use the same axes as those shown in this figure: these axes were unchanged throughout.
