# Supplementary material for: A CO2 sensing module modulates β-1,3-glucan exposure in Candida albicans
Source: PubMed Central journal article supplement (PMC10865862; doi:10.1128/mbio.01898-23), 2024-01-23
Supplement: mbio.01898-23-s0005.pdf [file mbio.01898-23-s0005.pdf]

**Supplementary Table 1. *C. albicans* clinical isolates used in this study.**

All isolates, with the exception of SC5314 (Supplementary Table 2), were from the Pasteur Institute.

| Isolate Number | Cluster* | Infection   | Isolate Number | Cluster* | Infection   |
|----------------|----------|-------------|----------------|----------|-------------|
| SC5314         | 1        | invasive    |                |          |             |
| CEC704         | 4        | superficial | CEC3634        | 8        | commensal   |
| CEC708         | 4        | superficial | CEC3636        | 1        | commensal   |
| CEC709         | 3        | superficial | CEC3638        | 3        | commensal   |
| CEC711         | 4        | superficial | CEC3658        | 1        | superficial |
| CEC712         | 4        | superficial | CEC3659        | 4        | superficial |
| CEC716         | 12       | superficial | CEC3660        | 1        | superficial |
| CEC718         | 1        | superficial | CEC3661        | C        | superficial |
| CEC1289        | 3        | invasive    | CEC3662        | 1        | invasive    |
| CEC1424        | 1        | superficial | CEC3663        | NC       | invasive    |
| CEC1426        | 11       | superficial | CEC3668        | 9        | superficial |
| CEC1427        | 4        | invasive    | CEC3669        | 2        | superficial |
| CEC1492        | 4        | unknown     | CEC3672        | 1        | invasive    |
| CEC2018        | 9        | superficial | CEC3673        | 1        | invasive    |
| CEC2019        | 12       | superficial | CEC3674        | 4        | superficial |
| CEC2020        | 1        | superficial | CEC3675        | 4        | invasive    |
| CEC2021        | 2        | invasive    | CEC3676        | 4        | superficial |
| CEC2022        | 4        | invasive    | CEC3678        | 1        | superficial |
| CEC2023        | 8        | commensal   | CEC3679        | 1        | superficial |
| CEC2871        | 18       | invasive    | CEC3680        | 12       | invasive    |
| CEC2872        | 18       | invasive    | CEC3681        | 3        | invasive    |
| CEC2876        | 18       | invasive    | CEC3682        | 1        | invasive    |
| CEC3494        | 11       | superficial | CEC3683        | 4        | invasive    |
| CEC3529        | 1        | commensal   | CEC3685        | 12       | invasive    |
| CEC3530        | 4        | commensal   | CEC3686        | 12       | invasive    |
| CEC3531        | 2        | commensal   | CEC3704        | 11       | superficial |
| CEC3532        | 4        | commensal   | CEC3711        | 10       | superficial |
| CEC3533        | 9        | commensal   | CEC3712        | NC       | superficial |
| CEC3534        | 1        | commensal   | CEC3715        | A        | superficial |
| CEC3535        | 4        | commensal   | CEC3716        | 4        | superficial |
| CEC3536        | 4        | commensal   | CEC3786        | 18       | invasive    |
| CEC3537        | 12       | commensal   | CEC4032        | 1        | superficial |
| CEC3540        | 4        | invasive    | CEC4035        | 1        | superficial |
| CEC3541        | 4        | invasive    | CEC4038        | A        | superficial |
| CEC3544        | 1        | commensal   | CEC4039        | C        | superficial |
| CEC3547        | 11       | commensal   | CEC4103        | 13       | superficial |
| CEC3548        | A        | commensal   | CEC4104        | 13       | superficial |
| CEC3549        | 2        | commensal   | CEC4106        | 1        | superficial |
| CEC3550        | 16       | starling    | CEC4107        | 1        | superficial |
| CEC3551        | 4        | superficial | CEC4108        | 1        | superficial |
| CEC3553        | 2        | commensal   | CEC4256        | 1        | superficial |
| CEC3554        | 3        | superficial | CEC4259        | 1        | invasive    |

|         |    |             |         |    |             |
|---------|----|-------------|---------|----|-------------|
| CEC3555 | NC | invasive    | CEC4261 | NC | superficial |
| CEC3556 | 4  | commensal   | CEC4479 | 1  | environment |
| CEC3557 | 3  | commensal   | CEC4484 | 1  | environment |
| CEC3558 | 2  | commensal   | CEC4487 | 2  | environment |
| CEC3559 | 4  | superficial | CEC4492 | 11 | environment |
| CEC3560 | 1  | superficial | CEC4497 | 4  | environment |
| CEC3561 | 11 | commensal   | CEC4550 | 4  | superficial |
| CEC3579 | 3  | commensal   | CEC4552 | 4  | superficial |
| CEC3596 | 3  | invasive    | CEC4551 | 4  | superficial |
| CEC3597 | 3  | invasive    | CEC4549 | 4  | superficial |
| CEC3601 | 11 | commensal   | CEC4547 | 4  | superficial |
| CEC3602 | 4  | commensal   | CEC4501 | NC | superficial |
| CEC3603 | 1  | commensal   | CEC4502 | NC | superficial |
| CEC3605 | 1  | commensal   | CEC4503 | 11 | superficial |
| CEC3607 | 4  | commensal   | CEC4508 | 11 | superficial |
| CEC3609 | 1  | commensal   | CEC4504 | 11 | superficial |
| CEC3610 | 4  | commensal   | CEC4511 | 1  | superficial |
| CEC3611 | 4  | commensal   | CEC4514 | 1  | superficial |
| CEC3612 | 2  | commensal   | CEC4515 | 11 | superficial |
| CEC3613 | NC | commensal   | CEC4519 | 11 | superficial |
| CEC3614 | 2  | commensal   | CEC4520 | 11 | superficial |
| CEC3615 | 2  | commensal   | CEC4521 | 11 | superficial |
| CEC3616 | 10 | commensal   | CEC4522 | 11 | superficial |
| CEC3617 | 1  | commensal   | CEC4523 | 11 | superficial |
| CEC3618 | 11 | commensal   | CEC4524 | 11 | superficial |
| CEC3619 | NC | commensal   | CEC4526 | 4  | superficial |
| CEC3621 | 1  | commensal   | CEC4527 | 11 | superficial |
| CEC3622 | 8  | commensal   | CEC4528 | 11 | superficial |
| CEC3623 | 1  | commensal   | CEC4561 | 11 | superficial |
| CEC3626 | 3  | commensal   | CEC4568 | 11 | superficial |
| CEC3627 | 1  | commensal   | CEC4579 | 11 | superficial |

\* NC, no cluster assigned

**Supplementary Table 2. Laboratory strains of *C. albicans* used in this study.**

| Strain | pseudonym       | Parent | Genotype                                                     | Source     |
|--------|-----------------|--------|--------------------------------------------------------------|------------|
| SC5314 |                 |        | Clinical blood isolate                                       | 1          |
| CAF2-1 | CAF2-1          | SC5314 | <i>ura3/URA3</i>                                             | 2          |
| CAI4   | CAI4            | CAF2-1 | <i>ura3/ura3</i>                                             | 2          |
| Ca372  | CAI4+Clp10      | CAI4   | CAI4, <i>RPS1-Clp10 (URA3)</i>                               | 3          |
| SN152  | SN152           | CAF2-1 | <i>arg4/arg4, leu2/leu2, his1/his1, URA3/ura3, IRO1/iro1</i> | 4          |
| Ca2469 | <i>ctn1-A</i>   | SC5314 | <i>ctn1/ctn1</i>                                             | this study |
| Ca2470 | <i>ctn1-B</i>   | SC5314 | <i>ctn1/ctn1</i>                                             | this study |
| Ca2467 | <i>cyb2-A</i>   | SC5314 | <i>cyb2/cyb2</i>                                             | this study |
| Ca2468 | <i>cyb2-B</i>   | SC5314 | <i>cyb2/cyb2</i>                                             | this study |
| Ca2465 | <i>ecm3-A</i>   | SC5314 | <i>ecm3/ecm3</i>                                             | this study |
| Ca2466 | <i>ecm3-B</i>   | SC5314 | <i>ecm3/ecm3</i>                                             | this study |
| Ca2475 | <i>hcm1-A</i>   | SC5314 | <i>hcm1/hcm1</i>                                             | this study |
| Ca2476 | <i>hcm1-B</i>   | SC5314 | <i>hcm1/hcm1</i>                                             | this study |
| Ca2481 | <i>nce103-A</i> | SC5314 | <i>nce103/nce103</i>                                         | this study |
| Ca2482 | <i>nce103-B</i> | SC5314 | <i>nce103/nce103</i>                                         | this study |
| Ca2472 | <i>osm2-A</i>   | SC5314 | <i>osm2/osm2</i>                                             | this study |
| Ca2473 | <i>osm2-B</i>   | SC5314 | <i>osm2/osm2</i>                                             | this study |
| Ca2486 | <i>pho84-A</i>  | SC5314 | <i>pho84/pho84</i>                                           | this study |
| Ca2487 | <i>pho84-B</i>  | SC5314 | <i>pho84/pho84</i>                                           | this study |
| Ca2478 | <i>try4-A</i>   | SC5314 | <i>try4/try4</i>                                             | this study |
| Ca2479 | <i>try4-B</i>   | SC5314 | <i>try4/try4</i>                                             | this study |
| Ca2484 | <i>try6-A</i>   | SC5314 | <i>try6/try6</i>                                             | this study |
| Ca2485 | <i>try6-B</i>   | SC5314 | <i>try6/try6</i>                                             | this study |
| CAS4   | <i>sch9</i>     | CAI4   | CAI4, <i>sch9::hisG/sch9::hisG</i>                           | 5          |
| rca1ΔY | <i>rca1</i>     | SN152  | SN152, <i>sch9::HIS1/sch9::LEU2</i>                          | 6          |

1. Gillum *et al.* (1984) Isolation of the *Candida albicans* gene for orotidine-5'-phosphate decarboxylase by complementation of *S. cerevisiae ura3* and *E. coli pyrF* mutations. *Molec. Gen. Genet.* **198**, 179-182.
2. Fonzi & Irwin (1993) Isogenic strain construction and gene mapping in *Candida albicans*. *Genetics* **134**, 717-728.
3. Murad *et al.* (2001) *NRG1* represses yeast-hypha morphogenesis and hypha-specific gene expression in *Candida albicans*. *EMBO. J.* **20**, 4742-4752.
4. Noble & Johnson (2005) Strains and strategies for large-scale gene deletion studies of the diploid human fungal pathogen *Candida albicans*. *Eukaryotic Cell.* **4**, 298-309.
5. Stichertnoth *et al.* (2011) Sch9 kinase integrates hypoxia and CO<sub>2</sub> sensing to suppress hyphal morphogenesis in *Candida albicans*. *Eukaryotic Cell.* **10**, 502-511.
6. Homann *et al.* (2009) A phenotypic profile of the *Candida albicans* regulatory network. *PLoS Genet* **5**, e1000783.
