# Supplementary material for: A CO2 sensing module modulates β-1,3-glucan exposure in Candida albicans
Source: PubMed Central journal article supplement (PMC10865862; doi:10.1128/mbio.01898-23), 2024-01-23
Supplement: mbio.01898-23-s0006.pdf [file mbio.01898-23-s0006.pdf]

**HYPOXIA: UP-REGULATED GENES**

- >2-fold UP
- >4-fold UP
- Targets

| Gene   | RESPONDERS |        |       |          |          | NON-RESPONDERS |        |       |          |          | NON-R logFC |
|--------|------------|--------|-------|----------|----------|----------------|--------|-------|----------|----------|-------------|
|        | logFC      | logCPM | LR    | PValue   | FDR      | logFC          | logCPM | LR    | PValue   | FDR      | RESP log FC |
| PHO84  | 5.60       | 7.05   | 56.34 | 6.09E-14 | 1.06E-11 | 2.70           | 7.05   | 17.13 | 3.49E-05 | 3.49E-05 | 0.48        |
| TRY6   | 4.67       | 3.15   | 45.74 | 1.35E-11 | 8.91E-10 | 3.34           | 3.15   | 26.59 | 2.52E-07 | 2.52E-07 | 0.72        |
| SAP2   | 3.82       | 3.67   | 25.20 | 5.18E-07 | 7.17E-06 | 1.26           | 3.67   | 3.33  | 6.82E-02 | 6.82E-02 | 0.33        |
| HWP1   | 3.70       | -0.02  | 23.92 | 1.01E-06 | 1.29E-05 | 0.71           | -0.02  | 1.02  | 3.12E-01 | 3.12E-01 | 0.19        |
| JEN2   | 3.58       | 1.47   | 21.27 | 3.99E-06 | 4.28E-05 | 0.40           | 1.47   | 0.32  | 5.70E-01 | 5.70E-01 | 0.11        |
| TRY4   | 3.55       | -0.44  | 22.32 | 2.31E-06 | 2.71E-05 | 0.34           | -0.44  | 0.23  | 6.30E-01 | 6.30E-01 | 0.10        |
| DUR3   | 3.53       | 4.70   | 32.54 | 1.17E-08 | 2.87E-07 | 1.44           | 4.70   | 6.36  | 1.17E-02 | 1.17E-02 | 0.41        |
| BTA1   | 3.30       | -0.63  | 45.58 | 1.46E-11 | 9.50E-10 | 1.12           | -0.63  | 5.57  | 1.83E-02 | 1.83E-02 | 0.34        |
| PBR1   | 3.21       | -0.16  | 20.88 | 4.89E-06 | 5.13E-05 | 2.21           | -0.16  | 10.88 | 9.75E-04 | 9.75E-04 | 0.69        |
| NCE103 | 3.11       | 4.01   | 64.02 | 1.23E-15 | 2.80E-13 | 0.86           | 4.01   | 5.60  | 1.80E-02 | 1.80E-02 | 0.28        |
| SMM1   | 3.08       | 3.93   | 36.75 | 1.35E-09 | 4.73E-08 | 0.79           | 3.93   | 2.81  | 9.35E-02 | 9.35E-02 | 0.26        |
| CTN1   | 2.98       | 3.14   | 44.89 | 2.08E-11 | 1.28E-09 | 0.54           | 3.14   | 1.71  | 1.91E-01 | 1.91E-01 | 0.18        |
| DBP2   | 2.95       | 7.10   | 38.25 | 6.24E-10 | 2.41E-08 | 0.37           | 7.10   | 0.71  | 4.01E-01 | 4.01E-01 | 0.13        |
| CDC6   | 2.84       | 1.65   | 50.29 | 1.33E-12 | 1.33E-10 | 1.52           | 1.65   | 15.63 | 7.69E-05 | 7.69E-05 | 0.53        |
| PGA26  | 2.69       | 2.33   | 20.87 | 4.92E-06 | 5.15E-05 | 0.45           | 2.33   | 0.65  | 4.22E-01 | 4.22E-01 | 0.17        |
| MAK16  | 2.64       | 5.56   | 17.03 | 3.68E-05 | 2.83E-04 | 0.75           | 5.56   | 1.55  | 2.13E-01 | 2.13E-01 | 0.29        |
| CDC54  | 2.62       | 4.56   | 62.61 | 2.52E-15 | 5.30E-13 | 1.62           | 4.56   | 25.54 | 4.34E-07 | 4.34E-07 | 0.62        |
| HCM1   | 2.54       | 2.88   | 51.53 | 7.06E-13 | 7.86E-11 | 1.52           | 2.88   | 19.73 | 8.91E-06 | 8.91E-06 | 0.60        |
| NOP14  | 2.50       | 5.39   | 22.09 | 2.60E-06 | 2.96E-05 | 0.35           | 5.39   | 0.49  | 4.84E-01 | 4.84E-01 | 0.14        |
| UGA6   | 2.47       | 0.20   | 24.03 | 9.51E-07 | 1.23E-05 | 1.68           | 0.20   | 11.75 | 6.10E-04 | 6.10E-04 | 0.68        |
| DIM1   | 2.47       | 4.30   | 17.84 | 2.40E-05 | 1.99E-04 | 0.02           | 4.30   | 0.00  | 9.76E-01 | 9.76E-01 | 0.01        |
| ENP2   | 2.37       | 5.00   | 16.35 | 5.26E-05 | 3.83E-04 | 0.43           | 5.00   | 0.58  | 4.46E-01 | 4.46E-01 | 0.18        |
| XOG1   | 2.37       | 4.93   | 36.79 | 1.32E-09 | 4.68E-08 | 1.39           | 4.93   | 13.39 | 2.53E-04 | 2.53E-04 | 0.59        |
| HIT1   | 2.32       | 1.99   | 46.00 | 1.18E-11 | 8.30E-10 | 0.19           | 1.99   | 0.32  | 5.74E-01 | 5.74E-01 | 0.08        |
| PCL1   | 2.29       | 3.47   | 52.39 | 4.55E-13 | 5.59E-11 | 1.09           | 3.47   | 12.50 | 4.06E-04 | 4.06E-04 | 0.47        |
| MCM3   | 2.27       | 5.79   | 51.11 | 8.71E-13 | 9.18E-11 | 0.91           | 5.79   | 8.86  | 2.91E-03 | 2.91E-03 | 0.40        |
| REI1   | 2.21       | 5.33   | 14.93 | 1.12E-04 | 7.18E-04 | 0.04           | 5.33   | 0.00  | 9.45E-01 | 9.45E-01 | 0.02        |
| DOT4   | 2.20       | 5.59   | 27.99 | 1.22E-07 | 2.10E-06 | 0.49           | 5.59   | 1.53  | 2.16E-01 | 2.16E-01 | 0.22        |
| UGA4   | 2.18       | 2.83   | 18.80 | 1.45E-05 | 1.29E-04 | 1.50           | 2.83   | 9.21  | 2.40E-03 | 2.40E-03 | 0.68        |
| MET3   | 2.18       | 7.99   | 17.94 | 2.27E-05 | 1.89E-04 | 0.21           | 7.99   | 0.18  | 6.75E-01 | 6.75E-01 | 0.09        |
| CDC46  | 2.17       | 4.75   | 50.47 | 1.21E-12 | 1.23E-10 | 1.02           | 4.75   | 11.87 | 5.70E-04 | 5.70E-04 | 0.47        |
| OFI1   | 2.15       | -1.29  | 8.88  | 2.88E-03 | 1.06E-02 | 0.74           | -1.29  | 1.04  | 3.07E-01 | 3.07E-01 | 0.34        |
| CYS3   | 2.15       | 9.18   | 20.90 | 4.83E-06 | 5.08E-05 | 0.23           | 9.18   | 0.25  | 6.15E-01 | 6.15E-01 | 0.11        |
| NOG1   | 2.13       | 6.71   | 13.23 | 2.76E-04 | 1.51E-03 | 0.20           | 6.71   | 0.12  | 7.28E-01 | 7.28E-01 | 0.09        |
| KTI11  | 2.13       | 2.63   | 11.32 | 7.65E-04 | 3.51E-03 | 0.81           | 2.63   | 1.77  | 1.84E-01 | 1.84E-01 | 0.38        |
| GIT1   | 2.11       | 0.08   | 23.42 | 1.30E-06 | 1.64E-05 | 0.33           | 0.08   | 0.60  | 4.38E-01 | 4.38E-01 | 0.16        |
| NAN1   | 2.10       | 5.61   | 23.55 | 1.22E-06 | 1.54E-05 | 0.53           | 5.61   | 1.61  | 2.04E-01 | 2.04E-01 | 0.25        |
| NIP7   | 2.09       | 4.90   | 12.25 | 4.65E-04 | 2.34E-03 | 0.07           | 4.90   | 0.02  | 8.99E-01 | 8.99E-01 | 0.03        |
| OGG1   | 2.07       | 3.19   | 17.75 | 2.52E-05 | 2.07E-04 | 0.59           | 3.19   | 1.56  | 2.12E-01 | 2.12E-01 | 0.29        |
| UTP13  | 2.07       | 5.71   | 15.61 | 7.80E-05 | 5.31E-04 | 0.30           | 5.71   | 0.37  | 5.46E-01 | 5.46E-01 | 0.15        |
| RMS1   | 2.07       | 4.78   | 36.78 | 1.33E-09 | 4.68E-08 | 0.24           | 4.78   | 0.54  | 4.64E-01 | 4.64E-01 | 0.12        |
| PZF1   | 2.06       | 3.20   | 40.77 | 1.71E-10 | 7.88E-09 | 0.74           | 3.20   | 5.60  | 1.80E-02 | 1.80E-02 | 0.36        |
| HGT17  | 2.05       | 0.70   | 14.47 | 1.42E-04 | 8.68E-04 | 0.64           | 0.70   | 1.45  | 2.28E-01 | 2.28E-01 | 0.31        |
| CAN1   | 2.05       | 6.49   | 31.65 | 1.84E-08 | 4.24E-07 | 0.48           | 6.49   | 1.88  | 1.71E-01 | 1.71E-01 | 0.23        |
| NOC4   | 2.04       | 5.34   | 15.93 | 6.56E-05 | 4.58E-04 | 0.12           | 5.34   | 0.06  | 8.11E-01 | 8.11E-01 | 0.06        |
| NOP6   | 2.03       | 4.83   | 18.25 | 1.94E-05 | 1.66E-04 | 0.08           | 4.83   | 0.03  | 8.67E-01 | 8.67E-01 | 0.04        |
| KRR1   | 2.02       | 5.83   | 12.07 | 5.12E-04 | 2.54E-03 | 0.16           | 5.83   | 0.08  | 7.79E-01 | 7.79E-01 | 0.08        |
| CCC1   | 2.02       | 6.05   | 21.76 | 3.09E-06 | 3.47E-05 | 0.92           | 6.05   | 4.79  | 2.86E-02 | 2.86E-02 | 0.46        |
| NOG2   | 2.02       | 6.13   | 12.96 | 3.19E-04 | 1.70E-03 | 0.35           | 6.13   | 0.41  | 5.21E-01 | 5.21E-01 | 0.17        |
| RRN11  | 2.00       | 3.40   | 29.08 | 6.95E-08 | 1.32E-06 | 0.55           | 3.40   | 2.30  | 1.29E-01 | 1.29E-01 | 0.27        |
| ENP1   | 2.00       | 4.94   | 11.62 | 6.52E-04 | 3.10E-03 | 0.34           | 4.94   | 0.36  | 5.47E-01 | 5.47E-01 | 0.17        |
| SPB4   | 1.99       | 4.41   | 15.74 | 7.27E-05 | 4.99E-04 | 0.20           | 4.41   | 0.17  | 6.77E-01 | 6.77E-01 | 0.10        |
| NOP8   | 1.99       | 4.55   | 17.44 | 2.97E-05 | 2.38E-04 | 0.40           | 4.55   | 0.76  | 3.83E-01 | 3.83E-01 | 0.20        |
| FRE10  | 1.98       | 9.13   | 38.37 | 5.86E-10 | 2.34E-08 | 0.58           | 9.13   | 3.56  | 5.91E-02 | 5.91E-02 | 0.29        |
| ECM1   | 1.97       | 4.35   | 16.11 | 5.97E-05 | 4.23E-04 | 0.14           | 4.35   | 0.09  | 7.69E-01 | 7.69E-01 | 0.07        |
| JIP5   | 1.97       | 5.22   | 16.48 | 4.93E-05 | 3.64E-04 | 0.21           | 5.22   | 0.21  | 6.50E-01 | 6.50E-01 | 0.11        |
| TOP1   | 1.96       | 5.26   | 46.20 | 1.07E-11 | 7.69E-10 | 0.27           | 5.26   | 0.96  | 3.27E-01 | 3.27E-01 | 0.14        |
| CFL5   | 1.96       | 5.58   | 14.54 | 1.37E-04 | 8.44E-04 | 0.03           | 5.58   | 0.00  | 9.50E-01 | 9.50E-01 | 0.02        |
| MCM2   | 1.94       | 4.37   | 51.43 | 7.44E-13 | 8.12E-11 | 1.11           | 4.37   | 17.76 | 2.51E-05 | 2.51E-05 | 0.57        |
| SPB1   | 1.94       | 5.80   | 12.39 | 4.32E-04 | 2.20E-03 | 0.14           | 5.80   | 0.07  | 7.93E-01 | 7.93E-01 | 0.07        |
| SDA1   | 1.93       | 6.27   | 15.12 | 1.01E-04 | 6.64E-04 | 0.11           | 6.27   | 0.05  | 8.25E-01 | 8.25E-01 | 0.06        |
| NSA1   | 1.93       | 5.60   | 10.51 | 1.18E-03 | 5.11E-03 | 0.25           | 5.60   | 0.20  | 6.59E-01 | 6.59E-01 | 0.13        |
| MCM6   | 1.92       | 5.39   | 54.13 | 1.88E-13 | 2.46E-11 | 0.81           | 5.39   | 10.03 | 1.54E-03 | 1.54E-03 | 0.42        |
| CIC1   | 1.91       | 5.91   | 9.81  | 1.74E-03 | 7.02E-03 | 0.48           | 5.91   | 0.67  | 4.13E-01 | 4.13E-01 | 0.25        |
| ZCF4   | 1.91       | 0.09   | 11.94 | 5.49E-04 | 2.70E-03 | 0.65           | 0.09   | 1.41  | 2.35E-01 | 2.35E-01 | 0.34        |
| SUL2   | 1.90       | 6.14   | 13.96 | 1.87E-04 | 1.09E-03 | 0.13           | 6.14   | 0.06  | 7.99E-01 | 7.99E-01 | 0.07        |

|        |      |       |       |          |          |      |       |       |          |          |      |
|--------|------|-------|-------|----------|----------|------|-------|-------|----------|----------|------|
| SET6   | 1.89 | 3.59  | 41.61 | 1.11E-10 | 5.60E-09 | 0.06 | 3.59  | 0.05  | 8.23E-01 | 8.23E-01 | 0.03 |
| UTP4   | 1.89 | 5.73  | 11.19 | 8.24E-04 | 3.75E-03 | 0.17 | 5.73  | 0.09  | 7.60E-01 | 7.60E-01 | 0.09 |
| CSI2   | 1.88 | 4.11  | 12.80 | 3.47E-04 | 1.82E-03 | 0.27 | 4.11  | 0.27  | 6.01E-01 | 6.01E-01 | 0.14 |
| HCA4   | 1.88 | 5.85  | 11.30 | 7.75E-04 | 3.55E-03 | 0.08 | 5.85  | 0.02  | 8.88E-01 | 8.88E-01 | 0.04 |
| DIP2   | 1.88 | 5.88  | 13.28 | 2.68E-04 | 1.47E-03 | 0.23 | 5.88  | 0.22  | 6.41E-01 | 6.41E-01 | 0.12 |
| RRP9   | 1.88 | 5.27  | 12.14 | 4.95E-04 | 2.47E-03 | 0.49 | 5.27  | 0.89  | 3.45E-01 | 3.45E-01 | 0.26 |
| PWP2   | 1.88 | 5.77  | 11.84 | 5.80E-04 | 2.83E-03 | 0.04 | 5.77  | 0.01  | 9.42E-01 | 9.42E-01 | 0.02 |
| YTM1   | 1.87 | 5.84  | 10.11 | 1.47E-03 | 6.12E-03 | 0.19 | 5.84  | 0.11  | 7.42E-01 | 7.42E-01 | 0.10 |
| SEN2   | 1.84 | 5.18  | 11.78 | 5.98E-04 | 2.88E-03 | 0.60 | 5.18  | 1.32  | 2.50E-01 | 2.50E-01 | 0.33 |
| UGA11  | 1.84 | 3.56  | 91.02 | 1.42E-21 | 4.19E-18 | 0.82 | 3.56  | 18.96 | 1.34E-05 | 1.34E-05 | 0.45 |
| BUD22  | 1.82 | 4.66  | 14.91 | 1.13E-04 | 7.22E-04 | 0.05 | 4.66  | 0.01  | 9.19E-01 | 9.19E-01 | 0.03 |
| SAS10  | 1.82 | 5.52  | 9.83  | 1.72E-03 | 6.96E-03 | 0.24 | 5.52  | 0.18  | 6.75E-01 | 6.75E-01 | 0.13 |
| RMP1   | 1.80 | 2.56  | 14.80 | 1.20E-04 | 7.56E-04 | 0.45 | 2.56  | 0.97  | 3.24E-01 | 3.24E-01 | 0.25 |
| KRE30  | 1.79 | 7.24  | 16.09 | 6.04E-05 | 4.26E-04 | 0.64 | 7.24  | 2.18  | 1.40E-01 | 1.40E-01 | 0.36 |
| HGT19  | 1.79 | 5.68  | 13.35 | 2.59E-04 | 1.43E-03 | 0.47 | 5.68  | 0.96  | 3.27E-01 | 3.27E-01 | 0.26 |
| HGT10  | 1.78 | 4.82  | 7.72  | 5.46E-03 | 1.80E-02 | 0.99 | 4.82  | 2.49  | 1.14E-01 | 1.14E-01 | 0.56 |
| TSR2   | 1.77 | 5.25  | 13.16 | 2.86E-04 | 1.55E-03 | 0.09 | 5.25  | 0.04  | 8.46E-01 | 8.46E-01 | 0.05 |
| RCL1   | 1.77 | 5.02  | 16.38 | 5.18E-05 | 3.79E-04 | 0.19 | 5.02  | 0.19  | 6.61E-01 | 6.61E-01 | 0.11 |
| UTP5   | 1.77 | 6.36  | 11.70 | 6.26E-04 | 2.99E-03 | 0.07 | 6.36  | 0.02  | 8.85E-01 | 8.85E-01 | 0.04 |
| DBP3   | 1.77 | 6.18  | 9.27  | 2.33E-03 | 8.96E-03 | 0.15 | 6.18  | 0.07  | 7.89E-01 | 7.89E-01 | 0.09 |
| RPP1   | 1.77 | 3.54  | 35.35 | 2.75E-09 | 8.49E-08 | 0.06 | 3.54  | 0.04  | 8.34E-01 | 8.34E-01 | 0.03 |
| MCD1   | 1.76 | 4.06  | 30.57 | 3.22E-08 | 6.81E-07 | 1.27 | 4.06  | 16.30 | 5.41E-05 | 5.41E-05 | 0.72 |
| MTG1   | 1.75 | 4.05  | 12.43 | 4.21E-04 | 2.16E-03 | 0.57 | 4.05  | 1.40  | 2.36E-01 | 2.36E-01 | 0.33 |
| ERB1   | 1.75 | 5.48  | 17.22 | 3.33E-05 | 2.62E-04 | 0.18 | 5.48  | 0.19  | 6.65E-01 | 6.65E-01 | 0.10 |
| HEM3   | 1.75 | 5.76  | 35.02 | 3.27E-09 | 9.75E-08 | 0.75 | 5.76  | 6.68  | 9.76E-03 | 9.76E-03 | 0.43 |
| WOR3   | 1.75 | 3.68  | 21.54 | 3.46E-06 | 3.82E-05 | 0.03 | 3.68  | 0.01  | 9.39E-01 | 9.39E-01 | 0.02 |
| UTP18  | 1.74 | 6.15  | 9.34  | 2.24E-03 | 8.64E-03 | 0.11 | 6.15  | 0.04  | 8.47E-01 | 8.47E-01 | 0.06 |
| ACH1   | 1.74 | 7.15  | 73.06 | 1.26E-17 | 5.31E-15 | 0.76 | 7.15  | 14.54 | 1.38E-04 | 1.38E-04 | 0.44 |
| HGT12  | 1.73 | 2.61  | 5.96  | 1.47E-02 | 3.97E-02 | 1.21 | 2.61  | 3.01  | 8.30E-02 | 8.30E-02 | 0.70 |
| DPB2   | 1.72 | 3.50  | 22.06 | 2.64E-06 | 3.00E-05 | 0.66 | 3.50  | 3.39  | 6.57E-02 | 6.57E-02 | 0.38 |
| RPC53  | 1.72 | 4.79  | 17.31 | 3.17E-05 | 2.51E-04 | 0.38 | 4.79  | 0.87  | 3.50E-01 | 3.50E-01 | 0.22 |
| ELF1   | 1.71 | 7.24  | 12.02 | 5.28E-04 | 2.61E-03 | 0.25 | 7.24  | 0.27  | 6.03E-01 | 6.03E-01 | 0.15 |
| BRG1   | 1.70 | 8.43  | 11.82 | 5.87E-04 | 2.84E-03 | 0.26 | 8.43  | 0.30  | 5.83E-01 | 5.83E-01 | 0.16 |
| CWC22  | 1.68 | 3.78  | 21.29 | 3.94E-06 | 4.24E-05 | 0.62 | 3.78  | 2.99  | 8.40E-02 | 8.40E-02 | 0.37 |
| OAC1   | 1.66 | 2.94  | 12.10 | 5.03E-04 | 2.51E-03 | 0.15 | 2.94  | 0.10  | 7.50E-01 | 7.50E-01 | 0.09 |
| RDN5   | 1.66 | 3.04  | 7.53  | 6.08E-03 | 1.96E-02 | 1.88 | 3.04  | 9.53  | 2.02E-03 | 2.02E-03 | 1.13 |
| SSF1   | 1.65 | 5.45  | 10.38 | 1.27E-03 | 5.43E-03 | 0.20 | 5.45  | 0.16  | 6.92E-01 | 6.92E-01 | 0.12 |
| XUT1   | 1.65 | 3.69  | 33.49 | 7.15E-09 | 1.87E-07 | 1.09 | 3.69  | 14.92 | 1.12E-04 | 1.12E-04 | 0.66 |
| DBP8   | 1.64 | 4.67  | 10.80 | 1.01E-03 | 4.48E-03 | 0.04 | 4.67  | 0.01  | 9.29E-01 | 9.29E-01 | 0.03 |
| IMP4   | 1.64 | 5.61  | 11.46 | 7.11E-04 | 3.31E-03 | 0.28 | 5.61  | 0.36  | 5.49E-01 | 5.49E-01 | 0.17 |
| RNY11  | 1.63 | -0.08 | 25.91 | 3.58E-07 | 5.30E-06 | 0.98 | -0.08 | 9.29  | 2.30E-03 | 2.30E-03 | 0.60 |
| FYV5   | 1.62 | 3.30  | 12.51 | 4.05E-04 | 2.08E-03 | 0.04 | 3.30  | 0.01  | 9.37E-01 | 9.37E-01 | 0.02 |
| RRP8   | 1.61 | 4.98  | 9.99  | 1.57E-03 | 6.44E-03 | 0.17 | 4.98  | 0.12  | 7.32E-01 | 7.32E-01 | 0.11 |
| CHR1   | 1.61 | 5.12  | 17.03 | 3.68E-05 | 2.83E-04 | 0.25 | 5.12  | 0.43  | 5.11E-01 | 5.11E-01 | 0.16 |
| TSR1   | 1.59 | 6.49  | 8.66  | 3.25E-03 | 1.17E-02 | 0.34 | 6.49  | 0.42  | 5.16E-01 | 5.16E-01 | 0.22 |
| KTI12  | 1.58 | 4.70  | 8.38  | 3.79E-03 | 1.32E-02 | 0.04 | 4.70  | 0.00  | 9.47E-01 | 9.47E-01 | 0.02 |
| PRN1   | 1.58 | 3.11  | 28.28 | 1.05E-07 | 1.84E-06 | 0.52 | 3.11  | 3.16  | 7.53E-02 | 7.53E-02 | 0.33 |
| SMC3   | 1.58 | 3.33  | 25.52 | 4.38E-07 | 6.28E-06 | 0.89 | 3.33  | 8.43  | 3.69E-03 | 3.69E-03 | 0.57 |
| ERG2   | 1.56 | 4.54  | 26.75 | 2.32E-07 | 3.68E-06 | 0.71 | 4.54  | 5.74  | 1.66E-02 | 1.66E-02 | 0.45 |
| ALG11  | 1.56 | 3.61  | 21.81 | 3.01E-06 | 3.40E-05 | 0.78 | 3.61  | 5.72  | 1.68E-02 | 1.68E-02 | 0.50 |
| VRG4   | 1.56 | 6.09  | 32.13 | 1.44E-08 | 3.45E-07 | 0.86 | 6.09  | 10.07 | 1.51E-03 | 1.51E-03 | 0.55 |
| SEF2   | 1.56 | 5.19  | 15.81 | 6.99E-05 | 4.83E-04 | 1.01 | 5.19  | 6.89  | 8.67E-03 | 8.67E-03 | 0.65 |
| CNS1   | 1.55 | 5.55  | 10.10 | 1.48E-03 | 6.13E-03 | 0.16 | 5.55  | 0.12  | 7.33E-01 | 7.33E-01 | 0.10 |
| RLP24  | 1.54 | 5.70  | 6.67  | 9.81E-03 | 2.91E-02 | 0.05 | 5.70  | 0.01  | 9.28E-01 | 9.28E-01 | 0.03 |
| DCC1   | 1.52 | 2.55  | 24.85 | 6.19E-07 | 8.37E-06 | 0.75 | 2.55  | 6.23  | 1.25E-02 | 1.25E-02 | 0.49 |
| RPA135 | 1.52 | 7.00  | 8.00  | 4.68E-03 | 1.59E-02 | 0.04 | 7.00  | 0.01  | 9.33E-01 | 9.33E-01 | 0.03 |
| LTV1   | 1.52 | 6.05  | 6.57  | 1.04E-02 | 3.02E-02 | 0.21 | 6.05  | 0.14  | 7.13E-01 | 7.13E-01 | 0.14 |
| MLH1   | 1.52 | 2.00  | 39.73 | 2.91E-10 | 1.28E-08 | 0.88 | 2.00  | 13.73 | 2.11E-04 | 2.11E-04 | 0.58 |
| PGA32  | 1.52 | 3.42  | 33.38 | 7.58E-09 | 1.97E-07 | 1.17 | 3.42  | 20.35 | 6.45E-06 | 6.45E-06 | 0.77 |
| ESC4   | 1.52 | 2.88  | 20.38 | 6.34E-06 | 6.40E-05 | 0.72 | 2.88  | 4.74  | 2.95E-02 | 2.95E-02 | 0.47 |
| NOP15  | 1.52 | 5.11  | 6.61  | 1.01E-02 | 2.98E-02 | 0.11 | 5.11  | 0.04  | 8.46E-01 | 8.46E-01 | 0.07 |
| TRM1   | 1.51 | 4.94  | 9.21  | 2.41E-03 | 9.15E-03 | 0.53 | 4.94  | 1.17  | 2.80E-01 | 2.80E-01 | 0.35 |
| HBR3   | 1.50 | 6.01  | 6.22  | 1.27E-02 | 3.54E-02 | 0.15 | 6.01  | 0.06  | 8.05E-01 | 8.05E-01 | 0.10 |
| RRN3   | 1.50 | 6.05  | 7.64  | 5.72E-03 | 1.87E-02 | 0.11 | 6.05  | 0.05  | 8.31E-01 | 8.31E-01 | 0.08 |
| ENA21  | 1.49 | 7.82  | 33.51 | 7.08E-09 | 1.86E-07 | 0.47 | 7.82  | 3.39  | 6.54E-02 | 6.54E-02 | 0.31 |
| SRP40  | 1.49 | 6.61  | 5.75  | 1.65E-02 | 4.36E-02 | 0.45 | 6.61  | 0.54  | 4.64E-01 | 4.64E-01 | 0.30 |
| CPA2   | 1.49 | 5.99  | 22.14 | 2.53E-06 | 2.93E-05 | 0.13 | 5.99  | 0.17  | 6.81E-01 | 6.81E-01 | 0.09 |
| FDH1   | 1.49 | 4.75  | 7.72  | 5.46E-03 | 1.80E-02 | 0.65 | 4.75  | 1.50  | 2.21E-01 | 2.21E-01 | 0.43 |
| RPA190 | 1.49 | 6.71  | 8.18  | 4.23E-03 | 1.46E-02 | 0.39 | 6.71  | 0.58  | 4.45E-01 | 4.45E-01 | 0.26 |
| PUT1   | 1.49 | 3.55  | 12.75 | 3.56E-04 | 1.86E-03 | 0.81 | 3.55  | 3.90  | 4.82E-02 | 4.82E-02 | 0.55 |
| SGD1   | 1.49 | 5.15  | 19.23 | 1.16E-05 | 1.06E-04 | 0.25 | 5.15  | 0.58  | 4.45E-01 | 4.45E-01 | 0.17 |
| DRS1   | 1.47 | 6.26  | 7.73  | 5.43E-03 | 1.79E-02 | 0.20 | 6.26  | 0.15  | 6.97E-01 | 6.97E-01 | 0.14 |
| OSM2   | 1.47 | 6.64  | 14.84 | 1.17E-04 | 7.42E-04 | 0.93 | 6.64  | 6.01  | 1.42E-02 | 1.42E-02 | 0.63 |

|       |      |       |       |          |          |      |       |       |          |          |      |
|-------|------|-------|-------|----------|----------|------|-------|-------|----------|----------|------|
| UTP21 | 1.47 | 5.79  | 7.80  | 5.23E-03 | 1.74E-02 | 0.03 | 5.79  | 0.00  | 9.56E-01 | 9.56E-01 | 0.02 |
| CAT1  | 1.46 | 9.36  | 8.63  | 3.31E-03 | 1.19E-02 | 0.99 | 9.36  | 4.01  | 4.52E-02 | 4.52E-02 | 0.67 |
| RLI1  | 1.46 | 7.70  | 7.23  | 7.19E-03 | 2.24E-02 | 0.67 | 7.70  | 1.56  | 2.12E-01 | 2.12E-01 | 0.46 |
| CEM1  | 1.46 | 3.14  | 53.34 | 2.80E-13 | 3.59E-11 | 0.59 | 3.14  | 8.86  | 2.92E-03 | 2.92E-03 | 0.40 |
| LAS1  | 1.45 | 4.76  | 26.82 | 2.24E-07 | 3.57E-06 | 0.29 | 4.76  | 1.15  | 2.84E-01 | 2.84E-01 | 0.20 |
| CDC47 | 1.45 | 5.67  | 43.70 | 3.82E-11 | 2.15E-09 | 0.82 | 5.67  | 14.44 | 1.45E-04 | 1.45E-04 | 0.57 |
| GUT1  | 1.45 | 5.23  | 18.04 | 2.16E-05 | 1.83E-04 | 0.29 | 5.23  | 0.74  | 3.90E-01 | 3.90E-01 | 0.20 |
| PMS1  | 1.44 | 3.09  | 22.95 | 1.66E-06 | 2.04E-05 | 0.82 | 3.09  | 7.73  | 5.44E-03 | 5.44E-03 | 0.57 |
| ALR1  | 1.43 | 6.93  | 28.15 | 1.12E-07 | 1.96E-06 | 0.47 | 6.93  | 3.10  | 7.83E-02 | 7.83E-02 | 0.33 |
| NOC2  | 1.43 | 7.12  | 6.19  | 1.29E-02 | 3.57E-02 | 0.25 | 7.12  | 0.20  | 6.54E-01 | 6.54E-01 | 0.18 |
| SMC1  | 1.42 | 4.83  | 26.44 | 2.72E-07 | 4.24E-06 | 0.60 | 4.83  | 4.78  | 2.88E-02 | 2.88E-02 | 0.42 |
| GDA1  | 1.42 | 6.33  | 22.97 | 1.65E-06 | 2.03E-05 | 0.67 | 6.33  | 5.24  | 2.20E-02 | 2.20E-02 | 0.47 |
| GIN1  | 1.41 | 4.25  | 19.55 | 9.82E-06 | 9.18E-05 | 0.56 | 4.25  | 3.17  | 7.50E-02 | 7.50E-02 | 0.40 |
| RRP15 | 1.41 | 5.08  | 6.34  | 1.18E-02 | 3.36E-02 | 0.27 | 5.08  | 0.25  | 6.17E-01 | 6.17E-01 | 0.20 |
| SWI6  | 1.41 | 4.69  | 36.62 | 1.43E-09 | 5.00E-08 | 0.80 | 4.69  | 12.14 | 4.93E-04 | 4.93E-04 | 0.57 |
| RRP6  | 1.40 | 5.99  | 11.81 | 5.89E-04 | 2.85E-03 | 0.21 | 5.99  | 0.27  | 6.05E-01 | 6.05E-01 | 0.15 |
| PRI2  | 1.40 | 3.14  | 13.21 | 2.79E-04 | 1.52E-03 | 0.61 | 3.14  | 2.54  | 1.11E-01 | 1.11E-01 | 0.43 |
| RRP42 | 1.39 | 3.29  | 31.36 | 2.15E-08 | 4.79E-07 | 0.81 | 3.29  | 10.79 | 1.02E-03 | 1.02E-03 | 0.58 |
| POP3  | 1.39 | 4.00  | 6.71  | 9.57E-03 | 2.85E-02 | 0.02 | 4.00  | 0.00  | 9.73E-01 | 9.73E-01 | 0.01 |
| CHA1  | 1.36 | 4.07  | 16.58 | 4.66E-05 | 3.48E-04 | 0.99 | 4.07  | 8.84  | 2.94E-03 | 2.94E-03 | 0.72 |
| MMS21 | 1.36 | 3.89  | 41.21 | 1.37E-10 | 6.45E-09 | 0.68 | 3.89  | 10.59 | 1.14E-03 | 1.14E-03 | 0.50 |
| FMP45 | 1.34 | 6.07  | 17.32 | 3.16E-05 | 2.51E-04 | 0.60 | 6.07  | 3.51  | 6.10E-02 | 6.10E-02 | 0.44 |
| MRT4  | 1.34 | 5.77  | 9.10  | 2.55E-03 | 9.61E-03 | 0.12 | 5.77  | 0.07  | 7.85E-01 | 7.85E-01 | 0.09 |
| HYS2  | 1.34 | 5.02  | 16.00 | 6.34E-05 | 4.44E-04 | 0.36 | 5.02  | 1.22  | 2.70E-01 | 2.70E-01 | 0.27 |
| NOP1  | 1.33 | 7.66  | 5.76  | 1.64E-02 | 4.36E-02 | 0.09 | 7.66  | 0.03  | 8.71E-01 | 8.71E-01 | 0.07 |
| AMO2  | 1.32 | 6.26  | 6.17  | 1.30E-02 | 3.59E-02 | 0.34 | 6.26  | 0.42  | 5.16E-01 | 5.16E-01 | 0.26 |
| RPC19 | 1.32 | 5.33  | 5.61  | 1.79E-02 | 4.63E-02 | 0.37 | 5.33  | 0.45  | 5.03E-01 | 5.03E-01 | 0.28 |
| BUD21 | 1.32 | 5.46  | 11.92 | 5.55E-04 | 2.72E-03 | 0.01 | 5.46  | 0.00  | 9.80E-01 | 9.80E-01 | 0.01 |
| RPC40 | 1.31 | 5.86  | 7.36  | 6.67E-03 | 2.09E-02 | 0.06 | 5.86  | 0.02  | 9.01E-01 | 9.01E-01 | 0.05 |
| PWP1  | 1.31 | 6.62  | 5.66  | 1.73E-02 | 4.53E-02 | 0.05 | 6.62  | 0.01  | 9.32E-01 | 9.32E-01 | 0.04 |
| RPF2  | 1.31 | 5.80  | 5.51  | 1.90E-02 | 4.84E-02 | 0.01 | 5.80  | 0.00  | 9.86E-01 | 9.86E-01 | 0.01 |
| TPO4  | 1.30 | 5.06  | 49.50 | 1.99E-12 | 1.89E-10 | 0.64 | 5.06  | 12.08 | 5.11E-04 | 5.11E-04 | 0.49 |
| PUS7  | 1.30 | 5.41  | 16.00 | 6.34E-05 | 4.44E-04 | 0.15 | 5.41  | 0.21  | 6.44E-01 | 6.44E-01 | 0.11 |
| POL1  | 1.30 | 6.16  | 17.93 | 2.29E-05 | 1.90E-04 | 0.56 | 6.16  | 3.40  | 6.54E-02 | 6.54E-02 | 0.43 |
| TRM2  | 1.29 | 5.47  | 5.76  | 1.64E-02 | 4.34E-02 | 0.36 | 5.47  | 0.45  | 5.02E-01 | 5.02E-01 | 0.28 |
| SOD2  | 1.29 | 6.91  | 33.28 | 7.98E-09 | 2.05E-07 | 0.78 | 6.91  | 12.28 | 4.58E-04 | 4.58E-04 | 0.60 |
| DCG1  | 1.28 | 2.77  | 15.15 | 9.91E-05 | 6.52E-04 | 0.62 | 2.77  | 3.57  | 5.87E-02 | 5.87E-02 | 0.48 |
| YVH1  | 1.28 | 4.43  | 6.46  | 1.10E-02 | 3.18E-02 | 0.02 | 4.43  | 0.00  | 9.69E-01 | 9.69E-01 | 0.02 |
| ANT1  | 1.27 | 2.81  | 30.64 | 3.11E-08 | 6.62E-07 | 0.38 | 2.81  | 2.81  | 9.39E-02 | 9.39E-02 | 0.30 |
| ARG1  | 1.27 | 7.16  | 11.64 | 6.44E-04 | 3.07E-03 | 0.08 | 7.16  | 0.05  | 8.22E-01 | 8.22E-01 | 0.07 |
| SKN1  | 1.27 | 2.05  | 28.58 | 8.98E-08 | 1.62E-06 | 0.83 | 2.05  | 12.33 | 4.47E-04 | 4.47E-04 | 0.65 |
| MEA1  | 1.26 | 3.34  | 24.94 | 5.90E-07 | 8.02E-06 | 0.43 | 3.34  | 3.04  | 8.13E-02 | 8.13E-02 | 0.34 |
| GUA1  | 1.26 | 7.79  | 5.93  | 1.49E-02 | 4.03E-02 | 0.25 | 7.79  | 0.24  | 6.26E-01 | 6.26E-01 | 0.20 |
| MNT2  | 1.26 | 5.90  | 16.46 | 4.96E-05 | 3.65E-04 | 0.52 | 5.90  | 2.87  | 9.03E-02 | 9.03E-02 | 0.41 |
| LAC1  | 1.26 | 5.27  | 15.89 | 6.70E-05 | 4.66E-04 | 0.54 | 5.27  | 2.96  | 8.52E-02 | 8.52E-02 | 0.43 |
| SMC5  | 1.25 | 4.64  | 19.35 | 1.09E-05 | 1.01E-04 | 0.77 | 4.64  | 7.55  | 6.00E-03 | 6.00E-03 | 0.62 |
| RIX7  | 1.25 | 5.37  | 15.19 | 9.74E-05 | 6.43E-04 | 0.28 | 5.37  | 0.80  | 3.71E-01 | 3.71E-01 | 0.23 |
| FAS2  | 1.25 | 9.49  | 35.11 | 3.11E-09 | 9.32E-08 | 0.77 | 9.49  | 13.57 | 2.29E-04 | 2.29E-04 | 0.62 |
| YOR1  | 1.25 | 5.85  | 11.26 | 7.90E-04 | 3.62E-03 | 0.59 | 5.85  | 2.57  | 1.09E-01 | 1.09E-01 | 0.47 |
| THG1  | 1.24 | 3.33  | 41.34 | 1.28E-10 | 6.10E-09 | 0.39 | 3.33  | 4.06  | 4.39E-02 | 4.39E-02 | 0.31 |
| MEP2  | 1.24 | 8.58  | 6.57  | 1.04E-02 | 3.03E-02 | 0.20 | 8.58  | 0.18  | 6.73E-01 | 6.73E-01 | 0.16 |
| RAS2  | 1.23 | 4.08  | 10.21 | 1.40E-03 | 5.83E-03 | 0.19 | 4.08  | 0.25  | 6.15E-01 | 6.15E-01 | 0.15 |
| BEM2  | 1.22 | 6.72  | 35.60 | 2.42E-09 | 7.51E-08 | 0.60 | 6.72  | 8.82  | 2.98E-03 | 2.98E-03 | 0.49 |
| PEA2  | 1.22 | 5.31  | 21.57 | 3.42E-06 | 3.78E-05 | 0.39 | 5.31  | 2.21  | 1.37E-01 | 1.37E-01 | 0.32 |
| DED1  | 1.22 | 7.45  | 9.36  | 2.22E-03 | 8.58E-03 | 0.26 | 7.45  | 0.45  | 5.02E-01 | 5.02E-01 | 0.22 |
| MTG2  | 1.22 | 4.78  | 14.66 | 1.29E-04 | 8.03E-04 | 0.16 | 4.78  | 0.26  | 6.11E-01 | 6.11E-01 | 0.13 |
| HEM1  | 1.21 | 7.16  | 27.19 | 1.85E-07 | 3.06E-06 | 0.33 | 7.16  | 2.09  | 1.49E-01 | 1.49E-01 | 0.27 |
| DUR35 | 1.21 | -0.64 | 6.66  | 9.87E-03 | 2.92E-02 | 0.92 | -0.64 | 3.76  | 5.25E-02 | 5.25E-02 | 0.76 |
| DBP7  | 1.21 | 5.59  | 10.35 | 1.29E-03 | 5.49E-03 | 0.06 | 5.59  | 0.02  | 8.81E-01 | 8.81E-01 | 0.05 |
| UTP9  | 1.20 | 6.90  | 6.78  | 9.21E-03 | 2.76E-02 | 0.08 | 6.90  | 0.03  | 8.69E-01 | 8.69E-01 | 0.06 |
| FAS1  | 1.20 | 9.67  | 35.14 | 3.07E-09 | 9.23E-08 | 0.72 | 9.67  | 12.82 | 3.43E-04 | 3.43E-04 | 0.60 |
| MSH6  | 1.19 | 5.30  | 21.86 | 2.94E-06 | 3.32E-05 | 0.85 | 5.30  | 11.18 | 8.29E-04 | 8.29E-04 | 0.71 |
| TIF3  | 1.19 | 7.76  | 9.22  | 2.40E-03 | 9.12E-03 | 0.45 | 7.76  | 1.32  | 2.50E-01 | 2.50E-01 | 0.37 |
| FLU1  | 1.18 | 4.62  | 22.52 | 2.08E-06 | 2.48E-05 | 0.21 | 4.62  | 0.73  | 3.92E-01 | 3.92E-01 | 0.18 |
| CTF8  | 1.18 | 1.68  | 10.02 | 1.55E-03 | 6.37E-03 | 0.47 | 1.68  | 1.65  | 1.99E-01 | 1.99E-01 | 0.40 |
| AAH1  | 1.17 | 3.46  | 6.59  | 1.03E-02 | 3.01E-02 | 0.51 | 3.46  | 1.28  | 2.57E-01 | 2.57E-01 | 0.44 |
| SMP3  | 1.17 | 3.66  | 14.74 | 1.23E-04 | 7.76E-04 | 0.48 | 3.66  | 2.53  | 1.12E-01 | 1.12E-01 | 0.41 |
| ERG25 | 1.17 | 4.60  | 19.59 | 9.60E-06 | 9.05E-05 | 0.78 | 4.60  | 8.81  | 2.99E-03 | 2.99E-03 | 0.67 |
| CIT1  | 1.16 | 8.14  | 12.53 | 4.01E-04 | 2.06E-03 | 0.22 | 8.14  | 0.46  | 5.00E-01 | 5.00E-01 | 0.19 |
| GUK1  | 1.16 | 5.59  | 11.50 | 6.98E-04 | 3.27E-03 | 0.38 | 5.59  | 1.25  | 2.63E-01 | 2.63E-01 | 0.33 |
| UTP22 | 1.16 | 6.25  | 8.53  | 3.50E-03 | 1.24E-02 | 0.42 | 6.25  | 1.16  | 2.82E-01 | 2.82E-01 | 0.36 |
| MMS22 | 1.15 | 3.15  | 21.18 | 4.19E-06 | 4.47E-05 | 0.79 | 3.15  | 9.99  | 1.57E-03 | 1.57E-03 | 0.68 |
| GIN4  | 1.15 | 5.42  | 36.49 | 1.54E-09 | 5.18E-08 | 0.76 | 5.42  | 16.10 | 6.00E-05 | 6.00E-05 | 0.66 |

|        |      |       |       |          |          |      |       |       |          |          |      |
|--------|------|-------|-------|----------|----------|------|-------|-------|----------|----------|------|
| QDR2   | 1.15 | 5.67  | 15.82 | 6.97E-05 | 4.82E-04 | 0.23 | 5.67  | 0.66  | 4.16E-01 | 4.16E-01 | 0.20 |
| PRS1   | 1.15 | 6.05  | 8.47  | 3.62E-03 | 1.27E-02 | 0.24 | 6.05  | 0.38  | 5.40E-01 | 5.40E-01 | 0.21 |
| DUT1   | 1.14 | 5.42  | 10.98 | 9.21E-04 | 4.14E-03 | 0.90 | 5.42  | 6.82  | 9.03E-03 | 9.03E-03 | 0.78 |
| YBL053 | 1.13 | 4.15  | 19.93 | 8.03E-06 | 7.74E-05 | 0.57 | 4.15  | 5.10  | 2.39E-02 | 2.39E-02 | 0.50 |
| ARG3   | 1.13 | 3.88  | 5.96  | 1.46E-02 | 3.97E-02 | 0.26 | 3.88  | 0.33  | 5.68E-01 | 5.68E-01 | 0.23 |
| CRC1   | 1.13 | 5.53  | 29.99 | 4.35E-08 | 8.85E-07 | 0.54 | 5.53  | 7.02  | 8.06E-03 | 8.06E-03 | 0.48 |
| ACS2   | 1.12 | 8.84  | 21.57 | 3.40E-06 | 3.78E-05 | 0.88 | 8.84  | 13.37 | 2.56E-04 | 2.56E-04 | 0.78 |
| PSF3   | 1.12 | 2.72  | 14.58 | 1.34E-04 | 8.31E-04 | 0.59 | 2.72  | 4.08  | 4.33E-02 | 4.33E-02 | 0.52 |
| DBF4   | 1.12 | 5.20  | 12.83 | 3.42E-04 | 1.81E-03 | 0.49 | 5.20  | 2.46  | 1.17E-01 | 1.17E-01 | 0.43 |
| CSM3   | 1.12 | 3.96  | 15.01 | 1.07E-04 | 6.93E-04 | 0.55 | 3.96  | 3.65  | 5.60E-02 | 5.60E-02 | 0.49 |
| GSC1   | 1.12 | 7.79  | 31.79 | 1.72E-08 | 4.04E-07 | 0.67 | 7.79  | 11.57 | 6.69E-04 | 6.69E-04 | 0.60 |
| HXT5   | 1.11 | 5.04  | 13.44 | 2.47E-04 | 1.38E-03 | 0.31 | 5.04  | 1.04  | 3.07E-01 | 3.07E-01 | 0.28 |
| HUT1   | 1.11 | 3.10  | 10.29 | 1.34E-03 | 5.63E-03 | 0.45 | 3.10  | 1.73  | 1.88E-01 | 1.88E-01 | 0.41 |
| NMD5   | 1.11 | 6.08  | 11.99 | 5.35E-04 | 2.64E-03 | 0.32 | 6.08  | 0.99  | 3.19E-01 | 3.19E-01 | 0.28 |
| ARG11  | 1.11 | 2.17  | 9.23  | 2.38E-03 | 9.08E-03 | 0.37 | 2.17  | 1.03  | 3.10E-01 | 3.10E-01 | 0.33 |
| POP4   | 1.10 | 4.26  | 12.78 | 3.50E-04 | 1.84E-03 | 0.05 | 4.26  | 0.03  | 8.58E-01 | 8.58E-01 | 0.05 |
| ASF1   | 1.10 | 4.03  | 18.47 | 1.72E-05 | 1.49E-04 | 0.60 | 4.03  | 5.56  | 1.84E-02 | 1.84E-02 | 0.54 |
| URA7   | 1.09 | 7.26  | 6.56  | 1.04E-02 | 3.05E-02 | 0.06 | 7.26  | 0.02  | 8.87E-01 | 8.87E-01 | 0.05 |
| RIO2   | 1.09 | 6.24  | 10.02 | 1.55E-03 | 6.36E-03 | 0.15 | 6.24  | 0.19  | 6.64E-01 | 6.64E-01 | 0.14 |
| NMD3   | 1.09 | 6.64  | 6.25  | 1.24E-02 | 3.48E-02 | 0.05 | 6.64  | 0.02  | 9.01E-01 | 9.01E-01 | 0.05 |
| SIT1   | 1.08 | 7.28  | 10.70 | 1.07E-03 | 4.71E-03 | 0.94 | 7.28  | 8.07  | 4.49E-03 | 4.49E-03 | 0.87 |
| PEL1   | 1.08 | 5.48  | 36.00 | 1.97E-09 | 6.22E-08 | 0.25 | 5.48  | 1.94  | 1.64E-01 | 1.64E-01 | 0.23 |
| ARG5,6 | 1.08 | 6.93  | 9.45  | 2.11E-03 | 8.23E-03 | #N/A | #N/A  | #N/A  | #N/A     | #N/A     | #N/A |
| DDC1   | 1.07 | 3.23  | 30.13 | 4.04E-08 | 8.24E-07 | 0.64 | 3.23  | 10.81 | 1.01E-03 | 1.01E-03 | 0.59 |
| PRP39  | 1.07 | 3.16  | 11.16 | 8.36E-04 | 3.80E-03 | 0.49 | 3.16  | 2.35  | 1.25E-01 | 1.25E-01 | 0.45 |
| GCS1   | 1.07 | 6.28  | 18.84 | 1.42E-05 | 1.27E-04 | 0.15 | 6.28  | 0.38  | 5.37E-01 | 5.37E-01 | 0.14 |
| NRM1   | 1.06 | 5.17  | 21.77 | 3.07E-06 | 3.45E-05 | 0.71 | 5.17  | 9.91  | 1.64E-03 | 1.64E-03 | 0.67 |
| SPE2   | 1.06 | 6.41  | 9.77  | 1.77E-03 | 7.12E-03 | 0.38 | 6.41  | 1.26  | 2.62E-01 | 2.62E-01 | 0.36 |
| ZCF19  | 1.06 | 2.66  | 17.99 | 2.22E-05 | 1.87E-04 | 0.30 | 2.66  | 1.49  | 2.22E-01 | 2.22E-01 | 0.28 |
| MTS1   | 1.06 | 7.89  | 19.96 | 7.91E-06 | 7.69E-05 | 0.83 | 7.89  | 12.25 | 4.64E-04 | 4.64E-04 | 0.78 |
| ZPR1   | 1.05 | 7.11  | 10.68 | 1.09E-03 | 4.76E-03 | 0.16 | 7.11  | 0.26  | 6.11E-01 | 6.11E-01 | 0.15 |
| RFC4   | 1.05 | 5.56  | 9.97  | 1.60E-03 | 6.54E-03 | 0.49 | 5.56  | 2.18  | 1.40E-01 | 1.40E-01 | 0.46 |
| HSX11  | 1.04 | 3.74  | 31.37 | 2.14E-08 | 4.79E-07 | 0.03 | 3.74  | 0.02  | 8.78E-01 | 8.78E-01 | 0.03 |
| IRR1   | 1.04 | 5.06  | 15.17 | 9.85E-05 | 6.49E-04 | 0.69 | 5.06  | 6.75  | 9.37E-03 | 9.37E-03 | 0.66 |
| OYE22  | 1.04 | 2.57  | 13.40 | 2.52E-04 | 1.40E-03 | 0.40 | 2.57  | 1.98  | 1.59E-01 | 1.59E-01 | 0.38 |
| FAA21  | 1.04 | 4.52  | 52.73 | 3.82E-13 | 4.79E-11 | 0.61 | 4.52  | 18.24 | 1.95E-05 | 1.95E-05 | 0.59 |
| CDR1   | 1.03 | 7.29  | 13.39 | 2.53E-04 | 1.40E-03 | 0.30 | 7.29  | 1.13  | 2.87E-01 | 2.87E-01 | 0.29 |
| HMX1   | 1.03 | 8.11  | 6.18  | 1.29E-02 | 3.58E-02 | 0.94 | 8.11  | 5.13  | 2.35E-02 | 2.35E-02 | 0.91 |
| MDR1   | 1.03 | 0.60  | 11.02 | 9.02E-04 | 4.07E-03 | 0.37 | 0.60  | 1.37  | 2.42E-01 | 2.42E-01 | 0.36 |
| PGA46  | 1.03 | 1.38  | 18.67 | 1.55E-05 | 1.36E-04 | 0.56 | 1.38  | 5.57  | 1.83E-02 | 1.83E-02 | 0.54 |
| PET127 | 1.03 | 4.99  | 5.71  | 1.69E-02 | 4.44E-02 | 0.28 | 4.99  | 0.43  | 5.11E-01 | 5.11E-01 | 0.27 |
| NCS2   | 1.03 | 5.21  | 5.69  | 1.71E-02 | 4.48E-02 | 0.19 | 5.21  | 0.20  | 6.55E-01 | 6.55E-01 | 0.19 |
| ERF1   | 1.03 | 7.55  | 7.96  | 4.78E-03 | 1.61E-02 | 0.41 | 7.55  | 1.26  | 2.62E-01 | 2.62E-01 | 0.39 |
| GZF3   | 1.03 | 7.92  | 6.78  | 9.22E-03 | 2.76E-02 | 0.37 | 7.92  | 0.91  | 3.41E-01 | 3.41E-01 | 0.36 |
| SLD5   | 1.02 | 2.48  | 25.01 | 5.69E-07 | 7.78E-06 | 0.67 | 2.48  | 10.97 | 9.27E-04 | 9.27E-04 | 0.66 |
| GDH3   | 1.02 | 10.07 | 15.43 | 8.56E-05 | 5.74E-04 | 0.15 | 10.07 | 0.35  | 5.53E-01 | 5.53E-01 | 0.15 |
| SMC6   | 1.02 | 5.41  | 12.95 | 3.20E-04 | 1.71E-03 | 0.32 | 5.41  | 1.29  | 2.57E-01 | 2.57E-01 | 0.31 |
| PGA45  | 1.02 | 4.79  | 5.54  | 1.86E-02 | 4.77E-02 | 0.59 | 4.79  | 1.92  | 1.66E-01 | 1.66E-01 | 0.59 |
| MNN4   | 1.01 | 5.77  | 19.24 | 1.15E-05 | 1.06E-04 | 0.45 | 5.77  | 3.88  | 4.89E-02 | 4.89E-02 | 0.45 |
| ALK2   | 1.01 | 4.27  | 27.71 | 1.41E-07 | 2.42E-06 | 0.09 | 4.27  | 0.21  | 6.48E-01 | 6.48E-01 | 0.09 |
| ACC1   | 1.01 | 8.73  | 21.67 | 3.23E-06 | 3.61E-05 | 0.69 | 8.73  | 10.10 | 1.48E-03 | 1.48E-03 | 0.68 |
| RPR2   | 1.01 | 2.67  | 17.69 | 2.60E-05 | 2.12E-04 | 0.39 | 2.67  | 2.68  | 1.01E-01 | 1.01E-01 | 0.39 |
| PRT1   | 1.00 | 7.96  | 5.61  | 1.79E-02 | 4.63E-02 | 0.47 | 7.96  | 1.23  | 2.67E-01 | 2.67E-01 | 0.46 |
| NAG3   | 1.00 | 4.13  | 12.74 | 3.58E-04 | 1.87E-03 | 0.39 | 4.13  | 1.98  | 1.59E-01 | 1.59E-01 | 0.39 |
| ENA2   | 1.00 | 6.02  | 9.06  | 2.61E-03 | 9.80E-03 | 1.04 | 6.02  | 9.84  | 1.71E-03 | 1.71E-03 | 1.04 |
| YMX6   | 1.00 | 3.66  | 15.03 | 1.06E-04 | 6.85E-04 | 0.42 | 3.66  | 2.64  | 1.04E-01 | 1.04E-01 | 0.42 |
| ADE8   | 0.99 | 6.21  | 10.22 | 1.39E-03 | 5.80E-03 | 0.23 | 6.21  | 0.57  | 4.51E-01 | 4.51E-01 | 0.23 |
| INO2   | 0.98 | 3.79  | 24.56 | 7.20E-07 | 9.58E-06 | 0.21 | 3.79  | 1.10  | 2.94E-01 | 2.94E-01 | 0.21 |
| UTP15  | 0.97 | 5.46  | 6.02  | 1.42E-02 | 3.86E-02 | 0.12 | 5.46  | 0.10  | 7.57E-01 | 7.57E-01 | 0.13 |
| NTG1   | 0.97 | 4.54  | 11.51 | 6.93E-04 | 3.25E-03 | 0.37 | 4.54  | 1.66  | 1.97E-01 | 1.97E-01 | 0.38 |
| HGT16  | 0.97 | 2.97  | 9.41  | 2.16E-03 | 8.38E-03 | 0.09 | 2.97  | 0.08  | 7.79E-01 | 7.79E-01 | 0.09 |
| PEX3   | 0.97 | 4.65  | 38.65 | 5.07E-10 | 2.05E-08 | 0.42 | 4.65  | 7.48  | 6.22E-03 | 6.22E-03 | 0.44 |
| TBF1   | 0.96 | 5.34  | 26.34 | 2.87E-07 | 4.42E-06 | 0.28 | 5.34  | 2.25  | 1.34E-01 | 1.34E-01 | 0.29 |
| RFC5   | 0.96 | 4.32  | 11.02 | 9.00E-04 | 4.06E-03 | 0.45 | 4.32  | 2.45  | 1.18E-01 | 1.18E-01 | 0.47 |
| DRE2   | 0.95 | 6.80  | 10.09 | 1.49E-03 | 6.17E-03 | 0.43 | 6.80  | 2.07  | 1.50E-01 | 1.50E-01 | 0.45 |
| OPT8   | 0.94 | 5.02  | 14.45 | 1.44E-04 | 8.74E-04 | 0.18 | 5.02  | 0.52  | 4.72E-01 | 4.72E-01 | 0.19 |
| CAT2   | 0.94 | 5.94  | 17.24 | 3.30E-05 | 2.60E-04 | 0.43 | 5.94  | 3.76  | 5.26E-02 | 5.26E-02 | 0.46 |
| POL30  | 0.94 | 6.44  | 11.32 | 7.66E-04 | 3.52E-03 | 0.65 | 6.44  | 5.47  | 1.93E-02 | 1.93E-02 | 0.69 |
| ROA1   | 0.93 | 5.55  | 22.62 | 1.97E-06 | 2.37E-05 | 0.21 | 5.55  | 1.20  | 2.73E-01 | 2.73E-01 | 0.23 |
| RPB8   | 0.93 | 5.33  | 11.48 | 7.03E-04 | 3.28E-03 | 0.29 | 5.33  | 1.11  | 2.93E-01 | 2.93E-01 | 0.31 |
| PUT2   | 0.92 | 4.91  | 12.09 | 5.06E-04 | 2.52E-03 | 0.11 | 4.91  | 0.17  | 6.81E-01 | 6.81E-01 | 0.12 |
| CLA4   | 0.92 | 5.25  | 20.87 | 4.92E-06 | 5.15E-05 | 0.68 | 5.25  | 11.40 | 7.36E-04 | 7.36E-04 | 0.74 |
| FAD2   | 0.91 | 7.65  | 8.39  | 3.77E-03 | 1.32E-02 | 0.53 | 7.65  | 2.85  | 9.16E-02 | 9.16E-02 | 0.58 |

|        |      |      |       |          |          |      |      |       |          |          |      |
|--------|------|------|-------|----------|----------|------|------|-------|----------|----------|------|
| PDE1   | 0.90 | 5.06 | 29.35 | 6.05E-08 | 1.18E-06 | 0.24 | 5.06 | 2.16  | 1.42E-01 | 1.42E-01 | 0.27 |
| POL3   | 0.89 | 5.65 | 21.30 | 3.94E-06 | 4.24E-05 | 0.50 | 5.65 | 6.83  | 8.98E-03 | 8.98E-03 | 0.56 |
| MRR1   | 0.89 | 4.93 | 26.67 | 2.41E-07 | 3.82E-06 | 0.58 | 4.93 | 11.36 | 7.52E-04 | 7.52E-04 | 0.65 |
| GLR1   | 0.89 | 7.05 | 12.70 | 3.67E-04 | 1.91E-03 | 0.66 | 7.05 | 6.99  | 8.19E-03 | 8.19E-03 | 0.74 |
| ISA1   | 0.88 | 7.56 | 13.98 | 1.85E-04 | 1.08E-03 | 0.15 | 7.56 | 0.43  | 5.13E-01 | 5.13E-01 | 0.17 |
| SEC62  | 0.87 | 5.52 | 11.55 | 6.76E-04 | 3.18E-03 | 0.59 | 5.52 | 5.28  | 2.15E-02 | 2.15E-02 | 0.67 |
| GPI7   | 0.87 | 4.26 | 12.17 | 4.85E-04 | 2.43E-03 | 0.42 | 4.26 | 2.82  | 9.31E-02 | 9.31E-02 | 0.48 |
| CLG1   | 0.87 | 7.32 | 7.21  | 7.26E-03 | 2.25E-02 | 0.10 | 7.32 | 0.10  | 7.51E-01 | 7.51E-01 | 0.12 |
| SAS2   | 0.87 | 3.96 | 5.83  | 1.57E-02 | 4.20E-02 | 0.45 | 3.96 | 1.56  | 2.12E-01 | 2.12E-01 | 0.51 |
| SCH9   | 0.87 | 5.01 | 19.13 | 1.22E-05 | 1.11E-04 | 0.08 | 5.01 | 0.15  | 6.97E-01 | 6.97E-01 | 0.09 |
| FOX3   | 0.86 | 4.72 | 16.52 | 4.81E-05 | 3.57E-04 | 0.55 | 4.72 | 6.75  | 9.37E-03 | 9.37E-03 | 0.64 |
| FOX2   | 0.86 | 5.59 | 10.23 | 1.38E-03 | 5.80E-03 | 0.41 | 5.59 | 2.32  | 1.28E-01 | 1.28E-01 | 0.47 |
| YMC2   | 0.86 | 5.27 | 7.37  | 6.63E-03 | 2.09E-02 | 0.28 | 5.27 | 0.80  | 3.72E-01 | 3.72E-01 | 0.33 |
| PRN4   | 0.86 | 5.85 | 24.53 | 7.33E-07 | 9.71E-06 | 0.34 | 5.85 | 3.79  | 5.15E-02 | 5.15E-02 | 0.39 |
| GDT1   | 0.86 | 5.41 | 36.33 | 1.67E-09 | 5.49E-08 | 0.19 | 5.41 | 1.77  | 1.83E-01 | 1.83E-01 | 0.22 |
| UTP8   | 0.86 | 6.61 | 6.84  | 8.92E-03 | 2.69E-02 | 0.04 | 6.61 | 0.01  | 9.10E-01 | 9.10E-01 | 0.04 |
| SEC14  | 0.86 | 7.37 | 14.53 | 1.38E-04 | 8.47E-04 | 0.03 | 7.37 | 0.02  | 8.78E-01 | 8.78E-01 | 0.04 |
| PGA7   | 0.85 | 6.54 | 7.95  | 4.81E-03 | 1.62E-02 | 0.64 | 6.54 | 4.56  | 3.28E-02 | 3.28E-02 | 0.75 |
| DNA2   | 0.84 | 4.40 | 16.01 | 6.32E-05 | 4.44E-04 | 0.36 | 4.40 | 2.94  | 8.65E-02 | 8.65E-02 | 0.43 |
| POL5   | 0.83 | 4.61 | 10.41 | 1.26E-03 | 5.37E-03 | 0.02 | 4.61 | 0.00  | 9.44E-01 | 9.44E-01 | 0.02 |
| HGT14  | 0.83 | 4.61 | 9.24  | 2.36E-03 | 9.03E-03 | 0.32 | 4.61 | 1.42  | 2.34E-01 | 2.34E-01 | 0.39 |
| MEX67  | 0.83 | 6.59 | 24.71 | 6.68E-07 | 8.95E-06 | 0.30 | 6.59 | 3.19  | 7.40E-02 | 7.40E-02 | 0.36 |
| ALA1   | 0.83 | 7.42 | 7.01  | 8.09E-03 | 2.48E-02 | 0.26 | 7.42 | 0.67  | 4.12E-01 | 4.12E-01 | 0.31 |
| PTK2   | 0.83 | 6.19 | 49.67 | 1.82E-12 | 1.76E-10 | 0.32 | 6.19 | 7.37  | 6.63E-03 | 6.63E-03 | 0.38 |
| ISU1   | 0.82 | 7.11 | 10.42 | 1.24E-03 | 5.33E-03 | 0.44 | 7.11 | 3.00  | 8.31E-02 | 8.31E-02 | 0.53 |
| YOX1   | 0.82 | 5.45 | 9.49  | 2.07E-03 | 8.09E-03 | 0.58 | 5.45 | 4.79  | 2.86E-02 | 2.86E-02 | 0.71 |
| PDS5   | 0.82 | 5.31 | 17.32 | 3.17E-05 | 2.51E-04 | 0.46 | 5.31 | 5.45  | 1.95E-02 | 1.95E-02 | 0.56 |
| HMG1   | 0.81 | 6.78 | 10.86 | 9.82E-04 | 4.35E-03 | 0.58 | 6.78 | 5.53  | 1.86E-02 | 1.86E-02 | 0.71 |
| PRP45  | 0.80 | 3.90 | 20.32 | 6.56E-06 | 6.55E-05 | 0.08 | 3.90 | 0.22  | 6.42E-01 | 6.42E-01 | 0.10 |
| RGS2   | 0.80 | 4.37 | 10.74 | 1.05E-03 | 4.63E-03 | 0.06 | 4.37 | 0.07  | 7.93E-01 | 7.93E-01 | 0.08 |
| CIS2   | 0.80 | 4.52 | 8.52  | 3.50E-03 | 1.24E-02 | 0.30 | 4.52 | 1.22  | 2.69E-01 | 2.69E-01 | 0.38 |
| GLN4   | 0.80 | 6.59 | 13.35 | 2.58E-04 | 1.43E-03 | 0.39 | 6.59 | 3.25  | 7.14E-02 | 7.14E-02 | 0.49 |
| DIP5   | 0.80 | 7.18 | 11.45 | 7.15E-04 | 3.32E-03 | 0.08 | 7.18 | 0.12  | 7.33E-01 | 7.33E-01 | 0.10 |
| SKN2   | 0.79 | 5.25 | 7.44  | 6.39E-03 | 2.03E-02 | 0.50 | 5.25 | 2.98  | 8.45E-02 | 8.45E-02 | 0.63 |
| EMP70  | 0.78 | 6.65 | 20.54 | 5.83E-06 | 5.99E-05 | 0.22 | 6.65 | 1.61  | 2.04E-01 | 2.04E-01 | 0.28 |
| SNL1   | 0.78 | 5.40 | 12.99 | 3.14E-04 | 1.68E-03 | 0.76 | 5.40 | 12.25 | 4.65E-04 | 4.65E-04 | 0.97 |
| TCC1   | 0.78 | 7.78 | 9.24  | 2.37E-03 | 9.05E-03 | 0.10 | 7.78 | 0.16  | 6.90E-01 | 6.90E-01 | 0.13 |
| NUP84  | 0.77 | 5.53 | 17.70 | 2.58E-05 | 2.12E-04 | 0.25 | 5.53 | 1.86  | 1.72E-01 | 1.72E-01 | 0.32 |
| SNM1   | 0.77 | 4.51 | 21.58 | 3.39E-06 | 3.77E-05 | 0.18 | 4.51 | 1.16  | 2.81E-01 | 2.81E-01 | 0.23 |
| TEN1   | 0.76 | 1.79 | 6.56  | 1.05E-02 | 3.05E-02 | 0.06 | 1.79 | 0.04  | 8.39E-01 | 8.39E-01 | 0.08 |
| HBR1   | 0.76 | 6.01 | 19.34 | 1.09E-05 | 1.01E-04 | 0.01 | 6.01 | 0.01  | 9.38E-01 | 9.38E-01 | 0.02 |
| CCN1   | 0.76 | 4.02 | 10.15 | 1.44E-03 | 6.02E-03 | 0.63 | 4.02 | 6.98  | 8.25E-03 | 8.25E-03 | 0.83 |
| IDI1   | 0.76 | 6.29 | 5.83  | 1.57E-02 | 4.20E-02 | 0.37 | 6.29 | 1.39  | 2.38E-01 | 2.38E-01 | 0.49 |
| FAA2-3 | 0.76 | 3.25 | 25.26 | 5.01E-07 | 7.00E-06 | 0.68 | 3.25 | 19.98 | 7.83E-06 | 7.83E-06 | 0.89 |
| NUP188 | 0.76 | 6.01 | 22.94 | 1.67E-06 | 2.04E-05 | 0.63 | 6.01 | 16.04 | 6.19E-05 | 6.19E-05 | 0.83 |
| EDC3   | 0.76 | 5.26 | 12.68 | 3.69E-04 | 1.92E-03 | 0.18 | 5.26 | 0.74  | 3.89E-01 | 3.89E-01 | 0.24 |
| PHO86  | 0.76 | 5.37 | 8.81  | 3.00E-03 | 1.10E-02 | 0.21 | 5.37 | 0.70  | 4.01E-01 | 4.01E-01 | 0.28 |
| LYS21  | 0.75 | 6.53 | 11.80 | 5.91E-04 | 2.86E-03 | 0.31 | 6.53 | 1.96  | 1.62E-01 | 1.62E-01 | 0.41 |
| CTF18  | 0.75 | 4.47 | 6.48  | 1.09E-02 | 3.15E-02 | 0.35 | 4.47 | 1.41  | 2.35E-01 | 2.35E-01 | 0.46 |
| REX3   | 0.75 | 3.44 | 6.18  | 1.29E-02 | 3.58E-02 | 0.14 | 3.44 | 0.21  | 6.44E-01 | 6.44E-01 | 0.18 |
| SOF1   | 0.75 | 6.26 | 5.55  | 1.85E-02 | 4.76E-02 | 0.11 | 6.26 | 0.12  | 7.24E-01 | 7.24E-01 | 0.15 |
| WSC1   | 0.74 | 4.83 | 12.37 | 4.36E-04 | 2.22E-03 | 0.19 | 4.83 | 0.83  | 3.62E-01 | 3.62E-01 | 0.26 |
| MAS2   | 0.74 | 5.81 | 6.35  | 1.18E-02 | 3.36E-02 | 0.10 | 5.81 | 0.11  | 7.38E-01 | 7.38E-01 | 0.13 |
| CYS4   | 0.74 | 7.17 | 8.14  | 4.33E-03 | 1.49E-02 | 0.22 | 7.17 | 0.71  | 4.00E-01 | 4.00E-01 | 0.29 |
| ADR1   | 0.74 | 4.48 | 7.83  | 5.15E-03 | 1.71E-02 | 0.12 | 4.48 | 0.20  | 6.52E-01 | 6.52E-01 | 0.16 |
| RNR1   | 0.73 | 7.70 | 9.24  | 2.37E-03 | 9.05E-03 | 0.46 | 7.70 | 3.70  | 5.45E-02 | 5.45E-02 | 0.63 |
| SEF1   | 0.73 | 6.55 | 10.41 | 1.25E-03 | 5.35E-03 | 0.35 | 6.55 | 2.37  | 1.24E-01 | 1.24E-01 | 0.48 |
| ARO7   | 0.73 | 5.00 | 28.57 | 9.04E-08 | 1.63E-06 | 0.28 | 5.00 | 4.26  | 3.91E-02 | 3.91E-02 | 0.38 |
| HFL1   | 0.73 | 4.12 | 20.29 | 6.66E-06 | 6.63E-05 | 0.50 | 4.12 | 9.60  | 1.95E-03 | 1.95E-03 | 0.69 |
| SIR2   | 0.72 | 3.14 | 12.57 | 3.91E-04 | 2.02E-03 | 0.09 | 3.14 | 0.21  | 6.51E-01 | 6.51E-01 | 0.13 |
| SAP10  | 0.72 | 5.80 | 16.57 | 4.69E-05 | 3.50E-04 | 0.49 | 5.80 | 7.63  | 5.73E-03 | 5.73E-03 | 0.68 |
| MCD4   | 0.72 | 3.66 | 8.28  | 4.01E-03 | 1.39E-02 | 0.47 | 3.66 | 3.53  | 6.01E-02 | 6.01E-02 | 0.65 |
| SMI1B  | 0.72 | 4.54 | 6.81  | 9.07E-03 | 2.72E-02 | 0.08 | 4.54 | 0.09  | 7.65E-01 | 7.65E-01 | 0.11 |
| ANP1   | 0.72 | 5.20 | 8.94  | 2.79E-03 | 1.04E-02 | 0.50 | 5.20 | 4.40  | 3.58E-02 | 3.58E-02 | 0.70 |
| NDT80  | 0.72 | 7.52 | 6.49  | 1.09E-02 | 3.14E-02 | 0.06 | 7.52 | 0.05  | 8.32E-01 | 8.32E-01 | 0.08 |
| EXO1   | 0.71 | 4.90 | 11.61 | 6.55E-04 | 3.11E-03 | 0.49 | 4.90 | 5.53  | 1.87E-02 | 1.87E-02 | 0.69 |
| RBR2   | 0.71 | 2.44 | 7.69  | 5.54E-03 | 1.82E-02 | 0.58 | 2.44 | 5.12  | 2.37E-02 | 2.37E-02 | 0.82 |
| CDC13  | 0.71 | 3.89 | 15.71 | 7.38E-05 | 5.05E-04 | 0.40 | 3.89 | 5.10  | 2.40E-02 | 2.40E-02 | 0.57 |
| PHO113 | 0.71 | 4.74 | 6.91  | 8.56E-03 | 2.60E-02 | 0.28 | 4.74 | 1.12  | 2.90E-01 | 2.90E-01 | 0.40 |
| MLT1   | 0.71 | 7.44 | 7.65  | 5.68E-03 | 1.86E-02 | 0.37 | 7.44 | 2.08  | 1.49E-01 | 1.49E-01 | 0.52 |
| SUI1   | 0.70 | 7.53 | 25.03 | 5.64E-07 | 7.74E-06 | 0.09 | 7.53 | 0.41  | 5.20E-01 | 5.20E-01 | 0.13 |
| CHS3   | 0.70 | 7.44 | 6.36  | 1.17E-02 | 3.33E-02 | 0.23 | 7.44 | 0.72  | 3.96E-01 | 3.96E-01 | 0.34 |
| POT1   | 0.69 | 5.54 | 5.78  | 1.62E-02 | 4.31E-02 | 0.55 | 5.54 | 3.71  | 5.41E-02 | 5.41E-02 | 0.80 |

|        |      |      |       |          |          |      |      |       |          |          |      |
|--------|------|------|-------|----------|----------|------|------|-------|----------|----------|------|
| MSH2   | 0.68 | 5.84 | 14.31 | 1.55E-04 | 9.29E-04 | 0.50 | 5.84 | 7.52  | 6.11E-03 | 6.11E-03 | 0.72 |
| ZCF17  | 0.68 | 5.26 | 7.43  | 6.43E-03 | 2.04E-02 | 0.03 | 5.26 | 0.02  | 8.91E-01 | 8.91E-01 | 0.05 |
| ABC1   | 0.68 | 7.24 | 6.22  | 1.26E-02 | 3.54E-02 | 0.14 | 7.24 | 0.27  | 6.02E-01 | 6.02E-01 | 0.21 |
| GLO2   | 0.68 | 6.38 | 10.00 | 1.57E-03 | 6.42E-03 | 0.51 | 6.38 | 5.57  | 1.83E-02 | 1.83E-02 | 0.74 |
| ISY1   | 0.68 | 3.84 | 6.98  | 8.22E-03 | 2.51E-02 | 0.19 | 3.84 | 0.54  | 4.61E-01 | 4.61E-01 | 0.28 |
| PTC2   | 0.68 | 7.30 | 10.35 | 1.30E-03 | 5.49E-03 | 0.30 | 7.30 | 2.00  | 1.58E-01 | 1.58E-01 | 0.44 |
| CAR1   | 0.67 | 5.71 | 5.68  | 1.71E-02 | 4.49E-02 | 0.23 | 5.71 | 0.67  | 4.13E-01 | 4.13E-01 | 0.34 |
| FEN1   | 0.67 | 5.53 | 5.54  | 1.86E-02 | 4.77E-02 | 0.02 | 5.53 | 0.00  | 9.49E-01 | 9.49E-01 | 0.03 |
| SPF1   | 0.67 | 7.08 | 9.83  | 1.71E-03 | 6.94E-03 | 0.47 | 7.08 | 4.93  | 2.64E-02 | 2.64E-02 | 0.71 |
| SMD2   | 0.67 | 3.59 | 10.30 | 1.33E-03 | 5.61E-03 | 0.31 | 3.59 | 2.19  | 1.38E-01 | 1.38E-01 | 0.46 |
| LEU5   | 0.67 | 5.56 | 8.10  | 4.43E-03 | 1.52E-02 | 0.10 | 5.56 | 0.17  | 6.82E-01 | 6.82E-01 | 0.14 |
| POX1-3 | 0.66 | 6.34 | 8.88  | 2.88E-03 | 1.06E-02 | 0.26 | 6.34 | 1.38  | 2.40E-01 | 2.40E-01 | 0.39 |
| TRX2   | 0.66 | 3.18 | 11.54 | 6.80E-04 | 3.20E-03 | 0.01 | 3.18 | 0.00  | 9.60E-01 | 9.60E-01 | 0.01 |
| RTA3   | 0.65 | 5.73 | 12.58 | 3.90E-04 | 2.01E-03 | 0.25 | 5.73 | 1.88  | 1.71E-01 | 1.71E-01 | 0.39 |
| EMP24  | 0.65 | 6.32 | 10.90 | 9.61E-04 | 4.28E-03 | 0.66 | 6.32 | 11.17 | 8.32E-04 | 8.32E-04 | 1.01 |
| IFA21  | 0.65 | 5.33 | 20.68 | 5.42E-06 | 5.61E-05 | 0.59 | 5.33 | 17.27 | 3.25E-05 | 3.25E-05 | 0.91 |
| UTR2   | 0.64 | 7.16 | 7.59  | 5.88E-03 | 1.91E-02 | 0.31 | 7.16 | 1.80  | 1.80E-01 | 1.80E-01 | 0.49 |
| NMT1   | 0.64 | 5.82 | 13.60 | 2.26E-04 | 1.29E-03 | 0.35 | 5.82 | 4.05  | 4.43E-02 | 4.43E-02 | 0.54 |
| PDC2   | 0.64 | 5.18 | 7.51  | 6.13E-03 | 1.97E-02 | 0.22 | 5.18 | 0.86  | 3.52E-01 | 3.52E-01 | 0.34 |
| RAT1   | 0.64 | 5.97 | 10.49 | 1.20E-03 | 5.16E-03 | 0.16 | 5.97 | 0.63  | 4.28E-01 | 4.28E-01 | 0.24 |
| GCN3   | 0.64 | 5.96 | 22.75 | 1.85E-06 | 2.23E-05 | 0.27 | 5.96 | 4.16  | 4.15E-02 | 4.15E-02 | 0.43 |
| FAL1   | 0.64 | 5.72 | 6.98  | 8.26E-03 | 2.52E-02 | 0.20 | 5.72 | 0.67  | 4.14E-01 | 4.14E-01 | 0.31 |
| MED1   | 0.63 | 5.20 | 20.70 | 5.36E-06 | 5.56E-05 | 0.46 | 5.20 | 10.93 | 9.44E-04 | 9.44E-04 | 0.73 |
| GIR2   | 0.62 | 5.39 | 7.07  | 7.83E-03 | 2.41E-02 | 0.15 | 5.39 | 0.39  | 5.34E-01 | 5.34E-01 | 0.23 |
| CAS4   | 0.62 | 6.49 | 13.40 | 2.51E-04 | 1.40E-03 | 0.44 | 6.49 | 6.64  | 9.97E-03 | 9.97E-03 | 0.70 |
| RFC3   | 0.62 | 5.03 | 6.99  | 8.18E-03 | 2.50E-02 | 0.39 | 5.03 | 2.82  | 9.30E-02 | 9.30E-02 | 0.63 |
| GUT2   | 0.62 | 8.36 | 5.82  | 1.58E-02 | 4.22E-02 | 0.26 | 8.36 | 1.03  | 3.11E-01 | 3.11E-01 | 0.42 |
| MNN9   | 0.62 | 6.33 | 15.30 | 9.19E-05 | 6.12E-04 | 0.37 | 6.33 | 5.42  | 1.99E-02 | 1.99E-02 | 0.59 |
| IML1   | 0.61 | 5.77 | 17.91 | 2.31E-05 | 1.92E-04 | 0.48 | 5.77 | 11.00 | 9.11E-04 | 9.11E-04 | 0.78 |
| CHO1   | 0.60 | 5.94 | 7.08  | 7.81E-03 | 2.41E-02 | 0.00 | 5.94 | 0.00  | 9.97E-01 | 9.97E-01 | 0.00 |
| CZF1   | 0.60 | 5.50 | 5.52  | 1.88E-02 | 4.81E-02 | 0.27 | 5.50 | 1.09  | 2.95E-01 | 2.95E-01 | 0.44 |
| RCN1   | 0.60 | 2.64 | 7.01  | 8.09E-03 | 2.48E-02 | 0.42 | 2.64 | 3.37  | 6.65E-02 | 6.65E-02 | 0.70 |
| SWI4   | 0.59 | 5.80 | 12.08 | 5.09E-04 | 2.53E-03 | 0.35 | 5.80 | 4.24  | 3.94E-02 | 3.94E-02 | 0.59 |
| TES1   | 0.59 | 3.30 | 16.29 | 5.44E-05 | 3.94E-04 | 0.28 | 3.30 | 3.66  | 5.57E-02 | 5.57E-02 | 0.47 |
| YEA4   | 0.59 | 3.16 | 18.58 | 1.63E-05 | 1.42E-04 | 0.34 | 3.16 | 6.09  | 1.36E-02 | 1.36E-02 | 0.57 |
| HFL2   | 0.59 | 5.35 | 14.94 | 1.11E-04 | 7.15E-04 | 0.06 | 5.35 | 0.15  | 7.02E-01 | 7.02E-01 | 0.10 |
| FGR13  | 0.59 | 3.37 | 12.12 | 4.99E-04 | 2.49E-03 | 0.34 | 3.37 | 3.99  | 4.57E-02 | 4.57E-02 | 0.58 |
| GNP3   | 0.59 | 4.56 | 18.20 | 1.99E-05 | 1.70E-04 | 0.21 | 4.56 | 2.42  | 1.20E-01 | 1.20E-01 | 0.36 |
| ASH2   | 0.58 | 5.41 | 19.07 | 1.26E-05 | 1.14E-04 | 0.32 | 5.41 | 5.69  | 1.70E-02 | 1.70E-02 | 0.55 |
| UBA2   | 0.58 | 5.93 | 18.73 | 1.51E-05 | 1.33E-04 | 0.27 | 5.93 | 4.03  | 4.48E-02 | 4.48E-02 | 0.46 |
| STE18  | 0.58 | 2.54 | 7.83  | 5.13E-03 | 1.71E-02 | 0.08 | 2.54 | 0.13  | 7.17E-01 | 7.17E-01 | 0.13 |
| SOK1   | 0.58 | 7.41 | 10.85 | 9.86E-04 | 4.36E-03 | 0.13 | 7.41 | 0.53  | 4.66E-01 | 4.66E-01 | 0.22 |
| POL2   | 0.57 | 5.54 | 6.21  | 1.27E-02 | 3.55E-02 | 0.41 | 5.54 | 3.22  | 7.28E-02 | 7.28E-02 | 0.72 |
| MPH1   | 0.57 | 4.25 | 8.53  | 3.48E-03 | 1.24E-02 | 0.39 | 4.25 | 3.92  | 4.78E-02 | 4.78E-02 | 0.68 |
| ROD1   | 0.57 | 6.93 | 7.06  | 7.88E-03 | 2.42E-02 | 0.01 | 6.93 | 0.00  | 9.69E-01 | 9.69E-01 | 0.01 |
| ZCF35  | 0.57 | 4.33 | 13.94 | 1.89E-04 | 1.10E-03 | 0.11 | 4.33 | 0.53  | 4.66E-01 | 4.66E-01 | 0.20 |
| NAT2   | 0.56 | 5.57 | 9.23  | 2.38E-03 | 9.07E-03 | 0.44 | 5.57 | 5.66  | 1.73E-02 | 1.73E-02 | 0.78 |
| POL32  | 0.56 | 5.35 | 5.63  | 1.77E-02 | 4.60E-02 | 0.30 | 5.35 | 1.62  | 2.03E-01 | 2.03E-01 | 0.54 |
| PBS2   | 0.56 | 6.99 | 8.51  | 3.53E-03 | 1.25E-02 | 0.26 | 6.99 | 1.91  | 1.67E-01 | 1.67E-01 | 0.47 |
| CDC68  | 0.56 | 6.99 | 21.37 | 3.78E-06 | 4.13E-05 | 0.48 | 6.99 | 15.99 | 6.38E-05 | 6.38E-05 | 0.86 |
| STE13  | 0.55 | 4.36 | 9.65  | 1.89E-03 | 7.53E-03 | 0.74 | 4.36 | 17.21 | 3.35E-05 | 3.35E-05 | 1.34 |
| CDS1   | 0.55 | 6.66 | 33.96 | 5.63E-09 | 1.53E-07 | 0.10 | 6.66 | 1.23  | 2.68E-01 | 2.68E-01 | 0.19 |
| SIM1   | 0.55 | 9.57 | 5.87  | 1.54E-02 | 4.13E-02 | 0.14 | 9.57 | 0.36  | 5.47E-01 | 5.47E-01 | 0.25 |
| ECM14  | 0.54 | 6.54 | 16.15 | 5.85E-05 | 4.17E-04 | 0.20 | 6.54 | 2.21  | 1.37E-01 | 1.37E-01 | 0.37 |
| HOL1   | 0.54 | 3.30 | 6.72  | 9.55E-03 | 2.85E-02 | 0.22 | 3.30 | 1.09  | 2.95E-01 | 2.95E-01 | 0.40 |
| ATS1   | 0.54 | 4.62 | 6.23  | 1.26E-02 | 3.52E-02 | 0.04 | 4.62 | 0.04  | 8.38E-01 | 8.38E-01 | 0.08 |
| LMO1   | 0.53 | 6.04 | 8.81  | 2.99E-03 | 1.09E-02 | 0.20 | 6.04 | 1.20  | 2.73E-01 | 2.73E-01 | 0.37 |
| RFA1   | 0.53 | 7.41 | 7.24  | 7.14E-03 | 2.22E-02 | 0.40 | 7.41 | 4.17  | 4.12E-02 | 4.12E-02 | 0.76 |
| IFH1   | 0.53 | 6.92 | 6.18  | 1.29E-02 | 3.58E-02 | 0.38 | 6.92 | 3.23  | 7.25E-02 | 7.25E-02 | 0.72 |
| AAT21  | 0.53 | 7.27 | 15.31 | 9.12E-05 | 6.09E-04 | 0.35 | 7.27 | 6.64  | 9.96E-03 | 9.96E-03 | 0.66 |
| UAP1   | 0.53 | 5.87 | 6.31  | 1.20E-02 | 3.40E-02 | 0.31 | 5.87 | 2.14  | 1.43E-01 | 1.43E-01 | 0.58 |
| PMT2   | 0.52 | 6.87 | 6.24  | 1.25E-02 | 3.50E-02 | 0.77 | 6.87 | 13.49 | 2.40E-04 | 2.40E-04 | 1.48 |
| SAP1   | 0.52 | 2.70 | 6.94  | 8.45E-03 | 2.57E-02 | 0.35 | 2.70 | 3.13  | 7.68E-02 | 7.68E-02 | 0.67 |
| GPI13  | 0.51 | 4.14 | 6.93  | 8.49E-03 | 2.58E-02 | 0.30 | 4.14 | 2.34  | 1.26E-01 | 1.26E-01 | 0.58 |
| PHM5   | 0.51 | 6.33 | 11.25 | 7.94E-04 | 3.63E-03 | 0.33 | 6.33 | 4.81  | 2.83E-02 | 2.83E-02 | 0.65 |
| MYO2   | 0.51 | 6.18 | 7.37  | 6.63E-03 | 2.09E-02 | 0.43 | 6.18 | 5.19  | 2.27E-02 | 2.27E-02 | 0.84 |
| MRS4   | 0.50 | 5.98 | 6.99  | 8.18E-03 | 2.50E-02 | 0.07 | 5.98 | 0.14  | 7.12E-01 | 7.12E-01 | 0.14 |
| FHL1   | 0.50 | 5.73 | 8.30  | 3.97E-03 | 1.38E-02 | 0.05 | 5.73 | 0.07  | 7.89E-01 | 7.89E-01 | 0.09 |
| PEX6   | 0.50 | 4.58 | 10.22 | 1.39E-03 | 5.80E-03 | 0.28 | 4.58 | 3.26  | 7.09E-02 | 7.09E-02 | 0.57 |
| DAL81  | 0.49 | 5.43 | 5.83  | 1.57E-02 | 4.20E-02 | 0.13 | 5.43 | 0.41  | 5.23E-01 | 5.23E-01 | 0.26 |
| KEX2   | 0.49 | 6.61 | 10.01 | 1.56E-03 | 6.39E-03 | 0.37 | 6.61 | 5.81  | 1.60E-02 | 1.60E-02 | 0.76 |
| CTA8   | 0.49 | 6.88 | 6.40  | 1.14E-02 | 3.27E-02 | 0.33 | 6.88 | 2.81  | 9.39E-02 | 9.39E-02 | 0.66 |
| CHS7   | 0.49 | 6.38 | 10.11 | 1.48E-03 | 6.12E-03 | 0.24 | 6.38 | 2.49  | 1.15E-01 | 1.15E-01 | 0.50 |

|        |      |       |       |          |          |      |       |       |          |          |      |
|--------|------|-------|-------|----------|----------|------|-------|-------|----------|----------|------|
| FGR10  | 0.48 | 2.95  | 9.25  | 2.35E-03 | 9.01E-03 | 0.36 | 2.95  | 4.94  | 2.63E-02 | 2.63E-02 | 0.74 |
| BUD5   | 0.48 | 5.50  | 7.17  | 7.41E-03 | 2.29E-02 | 0.18 | 5.50  | 1.02  | 3.13E-01 | 3.13E-01 | 0.38 |
| CGT1   | 0.48 | 5.86  | 17.34 | 3.12E-05 | 2.48E-04 | 0.21 | 5.86  | 3.19  | 7.42E-02 | 7.42E-02 | 0.43 |
| MUB1   | 0.48 | 5.92  | 15.73 | 7.30E-05 | 5.00E-04 | 0.38 | 5.92  | 9.66  | 1.89E-03 | 1.89E-03 | 0.78 |
| ARO80  | 0.48 | 4.88  | 8.98  | 2.73E-03 | 1.02E-02 | 0.47 | 4.88  | 8.55  | 3.45E-03 | 3.45E-03 | 0.98 |
| DFR1   | 0.47 | 4.17  | 15.95 | 6.50E-05 | 4.54E-04 | 0.39 | 4.17  | 10.52 | 1.18E-03 | 1.18E-03 | 0.82 |
| MP65   | 0.47 | 10.57 | 7.83  | 5.13E-03 | 1.71E-02 | 0.22 | 10.57 | 1.71  | 1.91E-01 | 1.91E-01 | 0.47 |
| ALG8   | 0.46 | 4.21  | 9.69  | 1.85E-03 | 7.39E-03 | 0.28 | 4.21  | 3.61  | 5.75E-02 | 5.75E-02 | 0.61 |
| MSC7   | 0.46 | 6.51  | 6.68  | 9.76E-03 | 2.90E-02 | 0.25 | 6.51  | 1.96  | 1.62E-01 | 1.62E-01 | 0.54 |
| MNT4   | 0.46 | 3.00  | 7.42  | 6.44E-03 | 2.04E-02 | 0.52 | 3.00  | 9.33  | 2.25E-03 | 2.25E-03 | 1.12 |
| RAD53  | 0.46 | 4.63  | 6.26  | 1.23E-02 | 3.46E-02 | 0.48 | 4.63  | 6.72  | 9.52E-03 | 9.52E-03 | 1.04 |
| FEN12  | 0.45 | 5.73  | 8.78  | 3.05E-03 | 1.11E-02 | 0.31 | 5.73  | 4.23  | 3.97E-02 | 3.97E-02 | 0.69 |
| PMT4   | 0.45 | 7.37  | 5.72  | 1.67E-02 | 4.41E-02 | 0.83 | 7.37  | 18.84 | 1.42E-05 | 1.42E-05 | 1.82 |
| RCK2   | 0.45 | 7.86  | 17.96 | 2.25E-05 | 1.88E-04 | 0.10 | 7.86  | 0.87  | 3.50E-01 | 3.50E-01 | 0.22 |
| PGA53  | 0.45 | 8.18  | 6.59  | 1.03E-02 | 3.01E-02 | 0.25 | 8.18  | 1.98  | 1.60E-01 | 1.60E-01 | 0.55 |
| RAC1   | 0.45 | 6.03  | 9.42  | 2.15E-03 | 8.36E-03 | 0.15 | 6.03  | 1.09  | 2.98E-01 | 2.98E-01 | 0.34 |
| AXL2   | 0.44 | 5.90  | 6.27  | 1.23E-02 | 3.45E-02 | 0.36 | 5.90  | 4.24  | 3.94E-02 | 3.94E-02 | 0.82 |
| TRY2   | 0.44 | 5.17  | 9.86  | 1.68E-03 | 6.84E-03 | 0.07 | 5.17  | 0.25  | 6.19E-01 | 6.19E-01 | 0.16 |
| SPE1   | 0.44 | 7.73  | 6.15  | 1.32E-02 | 3.63E-02 | 0.03 | 7.73  | 0.02  | 8.86E-01 | 8.86E-01 | 0.06 |
| ABZ1   | 0.44 | 5.89  | 7.45  | 6.34E-03 | 2.02E-02 | 0.15 | 5.89  | 0.86  | 3.54E-01 | 3.54E-01 | 0.34 |
| FOL1   | 0.44 | 4.72  | 8.63  | 3.31E-03 | 1.19E-02 | 0.38 | 4.72  | 6.54  | 1.06E-02 | 1.06E-02 | 0.87 |
| CSO99  | 0.44 | 5.75  | 5.45  | 1.95E-02 | 4.96E-02 | 0.12 | 5.75  | 0.44  | 5.06E-01 | 5.06E-01 | 0.28 |
| FLC1   | 0.44 | 7.00  | 6.20  | 1.28E-02 | 3.56E-02 | 0.06 | 7.00  | 0.13  | 7.17E-01 | 7.17E-01 | 0.15 |
| PMR1   | 0.44 | 6.37  | 13.54 | 2.33E-04 | 1.32E-03 | 0.39 | 6.37  | 11.06 | 8.81E-04 | 8.81E-04 | 0.90 |
| FAA4   | 0.43 | 8.99  | 9.88  | 1.67E-03 | 6.81E-03 | 0.07 | 8.99  | 0.28  | 5.96E-01 | 5.96E-01 | 0.17 |
| APM1   | 0.42 | 6.20  | 9.15  | 2.49E-03 | 9.42E-03 | 0.31 | 6.20  | 5.15  | 2.33E-02 | 2.33E-02 | 0.75 |
| TIP1   | 0.41 | 5.12  | 11.51 | 6.93E-04 | 3.25E-03 | 0.38 | 5.12  | 9.75  | 1.79E-03 | 1.79E-03 | 0.92 |
| CHT1   | 0.41 | 4.15  | 6.57  | 1.03E-02 | 3.02E-02 | 0.00 | 4.15  | 0.00  | 9.81E-01 | 9.81E-01 | 0.01 |
| RAD23  | 0.41 | 7.40  | 14.41 | 1.47E-04 | 8.86E-04 | 0.11 | 7.40  | 1.02  | 3.11E-01 | 3.11E-01 | 0.27 |
| GDS1   | 0.39 | 8.37  | 6.18  | 1.29E-02 | 3.58E-02 | 0.53 | 8.37  | 11.14 | 8.45E-04 | 8.45E-04 | 1.34 |
| DOT1   | 0.39 | 6.02  | 8.17  | 4.26E-03 | 1.47E-02 | 0.38 | 6.02  | 7.64  | 5.71E-03 | 5.71E-03 | 0.97 |
| RAD7   | 0.38 | 5.08  | 5.68  | 1.72E-02 | 4.50E-02 | 0.49 | 5.08  | 9.18  | 2.44E-03 | 2.44E-03 | 1.27 |
| CDC43  | 0.38 | 2.20  | 5.65  | 1.75E-02 | 4.57E-02 | 0.60 | 2.20  | 13.90 | 1.92E-04 | 1.92E-04 | 1.58 |
| TAC1   | 0.38 | 5.32  | 5.92  | 1.50E-02 | 4.04E-02 | 0.15 | 5.32  | 0.98  | 3.23E-01 | 3.23E-01 | 0.41 |
| SOH1   | 0.38 | 3.44  | 6.36  | 1.17E-02 | 3.33E-02 | 0.13 | 3.44  | 0.71  | 3.99E-01 | 3.99E-01 | 0.33 |
| STT3   | 0.38 | 6.15  | 5.70  | 1.69E-02 | 4.46E-02 | 0.65 | 6.15  | 16.71 | 4.37E-05 | 4.37E-05 | 1.72 |
| NOT5   | 0.37 | 6.54  | 8.81  | 3.00E-03 | 1.10E-02 | 0.02 | 6.54  | 0.02  | 8.90E-01 | 8.90E-01 | 0.05 |
| RTG3   | 0.36 | 6.43  | 6.57  | 1.04E-02 | 3.03E-02 | 0.13 | 6.43  | 0.93  | 3.36E-01 | 3.36E-01 | 0.38 |
| NGG1   | 0.35 | 5.83  | 11.48 | 7.04E-04 | 3.29E-03 | 0.21 | 5.83  | 3.93  | 4.73E-02 | 4.73E-02 | 0.59 |
| LHS1   | 0.35 | 6.63  | 8.44  | 3.66E-03 | 1.29E-02 | 0.44 | 6.63  | 13.33 | 2.61E-04 | 2.61E-04 | 1.26 |
| GVP36  | 0.35 | 6.05  | 6.86  | 8.81E-03 | 2.66E-02 | 0.36 | 6.05  | 7.47  | 6.27E-03 | 6.27E-03 | 1.04 |
| ERG27  | 0.34 | 5.18  | 13.33 | 2.61E-04 | 1.44E-03 | 0.38 | 5.18  | 16.59 | 4.64E-05 | 4.64E-05 | 1.12 |
| HST3   | 0.33 | 5.21  | 7.51  | 6.15E-03 | 1.97E-02 | 0.14 | 5.21  | 1.28  | 2.58E-01 | 2.58E-01 | 0.41 |
| PEX22  | 0.32 | 5.36  | 5.64  | 1.75E-02 | 4.57E-02 | 0.21 | 5.36  | 2.45  | 1.17E-01 | 1.17E-01 | 0.66 |
| RAD50  | 0.32 | 4.90  | 5.51  | 1.89E-02 | 4.83E-02 | 0.67 | 4.90  | 23.57 | 1.21E-06 | 1.21E-06 | 2.08 |
| YBP1   | 0.31 | 6.03  | 6.33  | 1.19E-02 | 3.38E-02 | 0.45 | 6.03  | 12.91 | 3.28E-04 | 3.28E-04 | 1.43 |
| PEX1   | 0.31 | 5.45  | 6.15  | 1.31E-02 | 3.62E-02 | 0.21 | 5.45  | 2.79  | 9.50E-02 | 9.50E-02 | 0.67 |
| MEC1   | 0.30 | 5.28  | 6.03  | 1.40E-02 | 3.84E-02 | 0.53 | 5.28  | 18.59 | 1.62E-05 | 1.62E-05 | 1.76 |
| OCH1   | 0.30 | 5.98  | 10.58 | 1.14E-03 | 4.97E-03 | 0.26 | 5.98  | 8.05  | 4.55E-03 | 4.55E-03 | 0.87 |
| POM152 | 0.30 | 5.80  | 8.90  | 2.85E-03 | 1.05E-02 | 0.38 | 5.80  | 14.66 | 1.29E-04 | 1.29E-04 | 1.28 |
| YAE1   | 0.28 | 4.62  | 5.92  | 1.50E-02 | 4.05E-02 | 0.10 | 4.62  | 0.81  | 3.67E-01 | 3.67E-01 | 0.37 |
| VTC3   | 0.28 | 7.10  | 5.56  | 1.84E-02 | 4.73E-02 | 0.18 | 7.10  | 2.28  | 1.31E-01 | 1.31E-01 | 0.64 |
| ECM39  | 0.28 | 5.68  | 6.27  | 1.23E-02 | 3.46E-02 | 0.29 | 5.68  | 7.05  | 7.94E-03 | 7.94E-03 | 1.06 |
| SPP1   | 0.27 | 4.91  | 7.01  | 8.12E-03 | 2.48E-02 | 0.35 | 4.91  | 11.76 | 6.05E-04 | 6.05E-04 | 1.30 |
| CKA1   | 0.27 | 6.57  | 6.02  | 1.42E-02 | 3.87E-02 | 0.07 | 6.57  | 0.40  | 5.26E-01 | 5.26E-01 | 0.26 |
| RPB7   | 0.23 | 5.28  | 5.66  | 1.74E-02 | 4.53E-02 | 0.03 | 5.28  | 0.12  | 7.27E-01 | 7.27E-01 | 0.15 |
| NUP85  | 0.23 | 6.25  | 7.08  | 7.81E-03 | 2.41E-02 | 0.28 | 6.25  | 10.67 | 1.09E-03 | 1.09E-03 | 1.23 |

**LACTATE: UP-REGULATED GENES**

- >2-fold UP
- >4-fold UP
- Targets

| Gene   | RESPONDERS |        |       |          |          | NON-RESPONDERS |        |       |          |          | NON-R logFC |
|--------|------------|--------|-------|----------|----------|----------------|--------|-------|----------|----------|-------------|
|        | logFC      | logCPM | LR    | PValue   | FDR      | logFC          | logCPM | LR    | PValue   | FDR      | RESP log FC |
| MRV4   | 3.91       | -0.93  | 15.02 | 1.06E-04 | 1.33E-02 | 2.82           | -0.93  | 8.43  | 3.68E-03 | 3.41E-01 | 0.72        |
| OSM2   | 3.55       | 6.64   | 73.83 | 8.50E-18 | 2.51E-14 | 2.70           | 6.64   | 45.89 | 1.25E-11 | 2.46E-08 | 0.76        |
| HGT1   | 3.40       | 5.28   | 27.73 | 1.40E-07 | 5.89E-05 | 3.32           | 5.28   | 26.58 | 2.52E-07 | 2.48E-04 | 0.98        |
| PGA31  | 3.39       | 2.13   | 23.62 | 1.17E-06 | 4.02E-04 | 0.21           | 2.13   | 0.11  | 7.40E-01 | 9.98E-01 | 0.06        |
| TRY4   | 3.38       | -0.44  | 20.48 | 6.03E-06 | 1.32E-03 | 0.64           | -0.44  | 0.84  | 3.59E-01 | 9.98E-01 | 0.19        |
| PRN3   | 3.21       | 5.65   | 31.69 | 1.81E-08 | 1.33E-05 | 0.28           | 5.65   | 0.29  | 5.93E-01 | 9.98E-01 | 0.09        |
| FET31  | 2.87       | 6.23   | 51.08 | 8.85E-13 | 1.74E-09 | 2.81           | 6.23   | 48.91 | 2.68E-12 | 7.91E-09 | 0.98        |
| HGT2   | 2.81       | 5.98   | 22.00 | 2.73E-06 | 6.71E-04 | 1.83           | 5.98   | 10.09 | 1.49E-03 | 2.25E-01 | 0.65        |
| SOD3   | 2.77       | 4.67   | 20.91 | 4.80E-06 | 1.09E-03 | 2.59           | 4.67   | 18.51 | 1.69E-05 | 1.11E-02 | 0.93        |
| CYB2   | 2.58       | 6.82   | 46.94 | 7.33E-12 | 1.08E-08 | 2.04           | 6.82   | 30.58 | 3.20E-08 | 3.77E-05 | 0.79        |
| PRA1   | 2.44       | -1.00  | 20.23 | 6.86E-06 | 1.39E-03 | 0.87           | -1.00  | 2.51  | 1.13E-01 | 9.28E-01 | 0.35        |
| RDN5   | 2.33       | 3.04   | 14.17 | 1.67E-04 | 1.79E-02 | 2.65           | 3.04   | 17.96 | 2.25E-05 | 1.21E-02 | 1.14        |
| PGA26  | 2.10       | 2.33   | 13.35 | 2.58E-04 | 2.49E-02 | 0.70           | 2.33   | 1.56  | 2.11E-01 | 9.98E-01 | 0.33        |
| HGT17  | 2.07       | 0.70   | 14.59 | 1.34E-04 | 1.49E-02 | 0.30           | 0.70   | 0.32  | 5.71E-01 | 9.98E-01 | 0.14        |
| SFC1   | 1.83       | 4.53   | 13.19 | 2.81E-04 | 2.67E-02 | 0.89           | 4.53   | 3.28  | 7.02E-02 | 8.36E-01 | 0.49        |
| ECM3   | 1.82       | 6.24   | 94.85 | 2.06E-22 | 1.21E-18 | 1.39           | 6.24   | 56.69 | 5.10E-14 | 3.01E-10 | 0.76        |
| CFL2   | 1.79       | 5.51   | 13.00 | 3.12E-04 | 2.83E-02 | 1.91           | 5.51   | 14.56 | 1.36E-04 | 4.21E-02 | 1.06        |
| PHHB   | 1.58       | 5.42   | 30.34 | 3.63E-08 | 1.95E-05 | 1.26           | 5.42   | 19.56 | 9.75E-06 | 7.19E-03 | 0.80        |
| ENA2   | 1.51       | 6.02   | 19.97 | 7.85E-06 | 1.49E-03 | 1.08           | 6.02   | 10.56 | 1.16E-03 | 2.01E-01 | 0.72        |
| ARD    | 1.34       | 9.17   | 20.34 | 6.49E-06 | 1.37E-03 | 0.68           | 9.17   | 5.33  | 2.09E-02 | 6.68E-01 | 0.51        |
| CAT2   | 1.26       | 5.94   | 30.69 | 3.03E-08 | 1.79E-05 | 0.54           | 5.94   | 5.69  | 1.71E-02 | 6.44E-01 | 0.43        |
| PRN1   | 1.15       | 3.11   | 15.20 | 9.69E-05 | 1.27E-02 | 0.83           | 3.11   | 8.07  | 4.50E-03 | 3.60E-01 | 0.72        |
| GCV1   | 1.03       | 6.44   | 14.76 | 1.22E-04 | 1.47E-02 | 0.54           | 6.44   | 4.16  | 4.13E-02 | 7.60E-01 | 0.53        |
| FOX2   | 1.01       | 5.59   | 13.87 | 1.96E-04 | 2.00E-02 | 0.44           | 5.59   | 2.71  | 9.99E-02 | 9.10E-01 | 0.44        |
| DIP5   | 1.00       | 7.18   | 18.13 | 2.06E-05 | 3.29E-03 | 0.65           | 7.18   | 7.76  | 5.34E-03 | 3.98E-01 | 0.65        |
| WAR1   | 0.96       | 6.00   | 11.71 | 6.22E-04 | 4.55E-02 | 0.51           | 6.00   | 3.33  | 6.80E-02 | 8.36E-01 | 0.53        |
| PXA2   | 0.83       | 5.07   | 14.70 | 1.26E-04 | 1.47E-02 | 0.42           | 5.07   | 3.87  | 4.92E-02 | 7.97E-01 | 0.51        |
| PXA1   | 0.80       | 5.93   | 15.60 | 7.84E-05 | 1.10E-02 | 0.35           | 5.93   | 3.07  | 7.99E-02 | 8.63E-01 | 0.44        |
| ANT1   | 0.78       | 2.81   | 11.70 | 6.24E-04 | 4.55E-02 | 0.30           | 2.81   | 1.69  | 1.94E-01 | 9.96E-01 | 0.38        |
| FOX3   | 0.76       | 4.72   | 12.69 | 3.67E-04 | 3.14E-02 | 0.57           | 4.72   | 7.13  | 7.59E-03 | 4.76E-01 | 0.75        |
| MIS11  | 0.73       | 9.00   | 12.08 | 5.10E-04 | 4.11E-02 | 0.40           | 9.00   | 3.58  | 5.86E-02 | 8.22E-01 | 0.54        |
| ECI1   | 0.71       | 5.21   | 12.19 | 4.81E-04 | 4.00E-02 | 0.61           | 5.21   | 9.04  | 2.64E-03 | 2.84E-01 | 0.86        |
| STD1   | 0.66       | 6.93   | 22.68 | 1.91E-06 | 5.37E-04 | 0.23           | 6.93   | 2.85  | 9.15E-02 | 8.85E-01 | 0.35        |
| PEX6   | 0.65       | 4.58   | 17.30 | 3.19E-05 | 4.95E-03 | 0.31           | 4.58   | 4.05  | 4.41E-02 | 7.62E-01 | 0.48        |
| FAA2-3 | 0.56       | 3.25   | 13.57 | 2.30E-04 | 2.26E-02 | 0.15           | 3.25   | 0.99  | 3.20E-01 | 9.98E-01 | 0.27        |
| PEX19  | 0.35       | 6.68   | 12.08 | 5.09E-04 | 4.11E-02 | 0.24           | 6.68   | 5.89  | 1.52E-02 | 6.28E-01 | 0.70        |
