# Supplementary material for: A CO2 sensing module modulates β-1,3-glucan exposure in Candida albicans
Source: PubMed Central journal article supplement (PMC10865862; doi:10.1128/mbio.01898-23), 2024-01-23
Supplement: mbio.01898-23-s0008.pdf [file mbio.01898-23-s0008.pdf]

**Supplementary Table 6. Stress and drug resistance of *C. albicans* mutants.**

| <b>CONDITION</b> |                | 30°C | 37°C | 42°C | 45°C | CO <sub>2</sub> | 37°C + FCS | NaCl      |
|------------------|----------------|------|------|------|------|-----------------|------------|-----------|
| <b>STRAIN</b>    | <b>isolate</b> | YPD  | YPD  | YPD  | YPD  | YPD             | 5%<br>YPD  | 1M<br>YPD |
| <i>try6</i>      | A              | 2    | 2    | 2    | 2    | 2               | 2          | 2         |
|                  | B              | 2    | 2    | 2    | 2    | 2               | 2          | 2         |
| <i>pho84</i>     | A              | 2    | 2    | 2    | 2    | 2               | 2          | 2         |
|                  | B              | 2    | 2    | 2    | 2    | 2               | 2          | 2         |
| <i>xog1</i>      | A              | 2    | 2    | 2    | 2    | 2               | 2          | 2         |
|                  | B              | 2    | 2    | 2    | 2    | 2               | 2          | 2         |
| <i>ctn1</i>      | A              | 2    | 2    | 2    | 2    | 2               | 2          | 2         |
|                  | B              | 2    | 2    | 2    | 2    | 2               | 2          | 2         |
| <i>cyb2</i>      | A              | 2    | 2    | 2    | 2    | 2               | 2          | 2         |
|                  | B              | 2    | 2    | 2    | 2    | 2               | 2          | 2         |
| <i>osm1</i>      | A              | 2    | 2    | 2    | 2    | 2               | 2          | 2         |
|                  | B              | 2    | 2    | 2    | 2    | 2               | 2          | 2         |
| <i>ecm3</i>      | A              | 2    | 2    | 2    | 2    | 2               | 2          | 2         |
|                  | B              | 2    | 2    | 2    | 2    | 2               | 2          | 2         |
| <i>hcm1</i>      | A              | 1    | 1    | 1    | 0    | 1               | 1          | 1         |
|                  | B              | 1    | 1    | 1    | 0    | 1               | 1          | 1         |
| <i>try4</i>      | A              | 2    | 2    | 2    | 2    | 2               | 2          | 2         |
|                  | B              | 2    | 2    | 2    | 2    | 2               | 2          | 2         |
| <i>nce103</i>    | A              | 0    | ND   | ND   | ND   | 2               | ND         | 2         |
|                  | B              | 0    | ND   | ND   | ND   | 2               | ND         | 2         |

0 = No growth  
 1 = Less growth than wt  
 2 = Same growth as wt  
 3 = More growth than wt  
 ND = Not done

**Notes:**

**A.** Wild type showed no growth under this condition



| 3-Aminotriazole<br>10 mM<br>YPD | Acetic Acid pH3<br>20 mM<br>YPD | Acetic Acid pH 6<br>20 mM<br>YPD | pH 4.5<br>YPD | pH 7<br>YPD | pH 9.5<br>YPD | Glucose<br>YNB |
|---------------------------------|---------------------------------|----------------------------------|---------------|-------------|---------------|----------------|
| 2                               | 1                               | 2                                | 2             | 2           | 2             | 2              |
| 2                               | 1                               | 2                                | 2             | 2           | 2             | 2              |
| 2                               | 2                               | 2                                | 2             | 2           | 2             | 2              |
| 2                               | 2                               | 2                                | 2             | 2           | 2             | 2              |
| 2                               | 1                               | 2                                | 2             | 2           | 2             | 2              |
| 2                               | 1                               | 2                                | 2             | 2           | 2             | 2              |
| 2                               | 3                               | 2                                | 2             | 2           | 2             | 2              |
| 2                               | 3                               | 2                                | 2             | 2           | 2             | 2              |
| 2                               | 3                               | 2                                | 2             | 2           | 2             | 2              |
| 2                               | 3                               | 2                                | 2             | 2           | 2             | 2              |
| 2                               | 3                               | 2                                | 2             | 2           | 2             | 2              |
| 2                               | 3                               | 2                                | 2             | 2           | 2             | 2              |
| 2                               | 2                               | 2                                | 2             | 2           | 2             | 2              |
| 2                               | 2                               | 2                                | 2             | 2           | 2             | 2              |
| 1                               | 0                               | 1                                | 1             | 2           | 2             | 1              |
| 1                               | 0                               | 1                                | 1             | 2           | 2             | 1              |
| 2                               | 2                               | 2                                | 2             | 2           | 2             | 2              |
| 2                               | 2                               | 2                                | 2             | 2           | 2             | 2              |
| 2                               | 1                               | 2                                | 2             | 2           | 2             | 1              |
| 2                               | 1                               | 2                                | 2             | 2           | 2             | 1              |

| Lactate<br>YNB | Glyc&EtOH<br>YNB | Congo red<br>0.3 mg/ml<br>YPD | Calcofluor White<br>0.06 mg/ml<br>YPD | Caffeine<br>1 mg/ml<br>YPD | Fluconazole (µg) |             |
|----------------|------------------|-------------------------------|---------------------------------------|----------------------------|------------------|-------------|
|                |                  |                               |                                       |                            | 0.065<br>YPD     | 0.65<br>YPD |
| 2              | 2                | 2                             | 2                                     | 2                          | 2                | 2           |
| 2              | 2                | 2                             | 2                                     | 2                          | 2                | 2           |
| 2              | 2                | 2                             | 2                                     | 2                          | 2                | 2           |
| 2              | 2                | 2                             | 2                                     | 2                          | 2                | 2           |
| 2              | 2                | 2                             | 2                                     | 2                          | 2                | 2           |
| 2              | 2                | 2                             | 2                                     | 2                          | 2                | 2           |
| 0              | 0                | 2                             | 2                                     | 2                          | 2                | 2           |
| 0              | 0                | 2                             | 2                                     | 2                          | 2                | 2           |
| 2              | 2                | 2                             | 2                                     | 2                          | 2                | 2           |
| 2              | 2                | 2                             | 2                                     | 2                          | 2                | 2           |
| 2              | 2                | 2                             | 2                                     | 2                          | 2                | 2           |
| 2              | 2                | 2                             | 2                                     | 2                          | 2                | 2           |
| 2              | 2                | 2                             | 2                                     | 2                          | 2                | 2           |
| 2              | 2                | 2                             | 2                                     | 2                          | 2                | 2           |
| 2              | 2                | 2                             | 2                                     | 2                          | 2                | 2           |
| 2              | 2                | 2                             | 2                                     | 2                          | 2                | 2           |
| 1              | 1                | 1                             | 2                                     | 1                          | 1                | 1           |
| 1              | 1                | 1                             | 2                                     | 1                          | 1                | 1           |
| 2              | 2                | 2                             | 2                                     | 2                          | 2                | 2           |
| 2              | 2                | 2                             | 2                                     | 2                          | 2                | 2           |
| 2              | 2                | 2                             | 2                                     | 2                          | 2                | 3           |
| 2              | 2                | 2                             | 2                                     | 2                          | 2                | 3           |

| ; /ml) | Caspofungin (µg/ml) |              |             | Ambisome <sup>A</sup> |
|--------|---------------------|--------------|-------------|-----------------------|
|        | 6.5<br>YPD          | 0.032<br>YPD | 0.32<br>YPD | 3.2<br>YPD            |
| 0      | 2                   | 2            | 2           | 2                     |
| 0      | 2                   | 2            | 2           | 2                     |
| 0      | 2                   | 2            | 2           | 2                     |
| 0      | 2                   | 2            | 2           | 2                     |
| 0      | 2                   | 2            | 2           | 2                     |
| 0      | 2                   | 2            | 2           | 2                     |
| 0      | 2                   | 2            | 2           | 2                     |
| 0      | 2                   | 2            | 2           | 2                     |
| 0      | 2                   | 2            | 2           | 2                     |
| 0      | 2                   | 2            | 2           | 2                     |
| 0      | 2                   | 2            | 2           | 2                     |
| 0      | 2                   | 2            | 2           | 2                     |
| 0      | 2                   | 2            | 2           | 2                     |
| 0      | 2                   | 2            | 2           | 2                     |
| 0      | 2                   | 2            | 2           | 2                     |
| 0      | 2                   | 2            | 2           | 2                     |
| 0      | 1                   | 1            | 1           | 2                     |
| 0      | 1                   | 1            | 1           | 2                     |
| 0      | 2                   | 2            | 2           | 2                     |
| 0      | 2                   | 2            | 2           | 2                     |
| 0      | 2                   | 2            | 2           | 2                     |
| 0      | 2                   | 2            | 2           | 2                     |

**Supplementary Table S6. Stress and drug resistance of *C. albicans* mutants.**

Resistance to stressors and antifungal drugs was tested by plating serial dilutions of the pairs of independent homozygous null mutants (A,B) for the nine target loci on rich (YPD) or minimal media (YNB) containing the specified stressor at the specified concentration (e.g. Supplementary Figure 2). Plates were incubated at 30 °C (unless specified otherwise) for 48 h, imaged, and the growth in the presence of stressor was estimated relative to growth in the absence of stressor: 0, no growth, dark pink; 1, low growth, light pink; 2, normal growth, white; 3, enhanced growth, green. The data represent median values from three independent experiments. Note that *nce103* phenotypes were tested under 5% CO<sub>2</sub>; nd, not done; na, not applicable.
