# Supplementary material for: A CO2 sensing module modulates β-1,3-glucan exposure in Candida albicans
Source: PubMed Central journal article supplement (PMC10865862; doi:10.1128/mbio.01898-23), 2024-01-23
Supplement: mbio.01898-23-s0009.pdf [file mbio.01898-23-s0009.pdf]

**Supplementary Table 7.  $\beta$ -1,3-glucan exposure by *C. albicans* deletion mutants.**

| Strain          | Glucose |      | Glucose + Lactate |     | Fold Change |
|-----------------|---------|------|-------------------|-----|-------------|
|                 | Ave MFI | SD   | Ave MFI           | SD  |             |
| WT (SC5314)     | 4638    | 85   | 2605              | 187 | 0.56        |
| <i>ctn1</i> A   | 4432    | 405  | 2710              | 183 | 0.61        |
| <i>ctn1</i> B   | 4190    | 529  | 2911              | 266 | 0.69        |
| <i>cyb2</i> A   | 4183    | 333  | 2430              | 98  | 0.58        |
| <i>cyb2</i> B   | 4569    | 164  | 2515              | 132 | 0.55        |
| <i>ecm3</i> A   | 5109    | 464  | 2583              | 287 | 0.51        |
| <i>ecm3</i> B   | 5316    | 58   | 2913              | 102 | 0.55        |
| <i>hcm1</i> A   | 5139    | 671  | 2300              | 234 | 0.45        |
| <i>hcm1</i> B   | 5496    | 416  | 2223              | 179 | 0.40        |
| <i>nce103</i> A | 3090    | 359  | 2622              | 222 | 0.85        |
| <i>nce103</i> B | 2826    | 256  | 2474              | 147 | 0.88        |
| <i>osm1</i> A   | 5139    | 671  | 2115              | 57  | 0.41        |
| <i>osm1</i> B   | 5496    | 416  | 2199              | 99  | 0.40        |
| <i>pho84</i> A  | 3682    | 456  | 2875              | 79  | 0.78        |
| <i>pho84</i> B  | 3956    | 485  | 2814              | 34  | 0.71        |
| <i>try4</i> A   | 6099    | 914  | 3328              | 858 | 0.55        |
| <i>try4</i> B   | 5937    | 880  | 3442              | 117 | 0.58        |
| <i>try6</i> A   | 5880    | 1495 | 3248              | 185 | 0.55        |
| <i>try6</i> B   | 6973    | 742  | 3268              | 346 | 0.47        |

**Supplementary Table S7.  $\beta$ -1,3-glucan exposure by *C. albicans* deletion mutants.**

Wild type (SC5314) and mutant *C. albicans* cells (Supplementary Table 2) were grown in GYNB or GYNB plus lactate at 30 °C and their levels of  $\beta$ -1,3-glucan exposure quantified by Fc-dectin-1 staining and flow cytometry. Means and standard deviations from three independent replicate experiments are shown.
