# Supplementary material for: A CO2 sensing module modulates β-1,3-glucan exposure in Candida albicans
Source: mBio. 2024 Jan 23;15(2):e01898-23. doi: 10.1128/mbio.01898-23 (PMC10865862; doi:10.1128/mbio.01898-23)
Supplement: Table S8 — Oligonucleotide primers used in this study. [file mbio.01898-23-s0010.pdf]

Supplementary Table 8. Oligonucleotide primers used in this study

Oligo sequence obtained from Min et al (2016) <https://msphere.asm.org/content/1/3/e00130-16/figures-only>

| Primer     | Sequence (5' -> 3')          |                                                                            |
|------------|------------------------------|----------------------------------------------------------------------------|
| CaCas9/for | ATCTCATTAGATTTGGAACCTGTGGGTT | Forward primer for amplification of <i>CaCas9</i> cassette                 |
| CaCas9/rev | TTCGAGCGTCCCAAAACCTTCT       | Reverse primer for amplification of <i>CaCas9</i> cassette                 |
| SNR52/F    | AAGAAAGAAAGAAAACCAGGAGTGAA   | Forward primer for amplification of <i>SNR52</i> promoter                  |
| sgRNA/R    | ACAAATATTTAAACTCGGGACCTGG    | Reverse primer for amplification of sgRNA scaffold                         |
| SNR52/N    | GCGGCCGCAAGTGATTAGACT        | Forward and reverse nested primers for third round PCR for construction of |
| sgRNA/N    | GCAGCTCAGTGATTAAGAGTAAAGATGG | sgRNA expression cassette                                                  |

Reverse primer for amplification of *SNR52* promoter with overlapping guide sequence of the target gene

|                              |                      |                              |
|------------------------------|----------------------|------------------------------|
| <b>Guide Sequence in red</b> |                      |                              |
| SNR52-sg-ECM3-Rv             | CAGTGAAGGGTCAGCTGTAA | CAAAATTA AAAATAGTTTACGCAAGTC |
| SNR52-sg-OSM2-Rv             | CAGTCAAATCCAAATCGAAA | CAAAATTA AAAATAGTTTACGCAAGTC |
| SNR52-sg-CYB2-Rv             | CTACAAATAATGGCACCACA | CAAAATTA AAAATAGTTTACGCAAGTC |
| SNR52-sg-NCE103-Rv           | CCACAATCAGTATGACCACA | CAAAATTA AAAATAGTTTACGCAAGTC |
| SNR52-sg-HCM1-Rv             | CCCAACATCTCCCTTCTTAT | CAAAATTA AAAATAGTTTACGCAAGTC |
| SNR52-sg-TRY4-Rv             | AGGAAGTGAAGTTGCCGTC  | CAAAATTA AAAATAGTTTACGCAAGTC |
| gma.SNR52.TRY6/R             | AAATGATAACATACCTAGAA | CAAAATTA AAAATAGTTTACGCAAGTC |
| gma.SNR52.CTN1/R             | CGAGATATGCATTACAAGTT | CAAAATTA AAAATAGTTTACGCAAGTC |
| gma.SNR52.PHO84/R            | AAATGAGAACAGAAATCTTT | CAAAATTA AAAATAGTTTACGCAAGTC |

Forward primer for amplification of sgRNA scaffold with overlapping guide sequence of the target gene

|                              |                       |                              |
|------------------------------|-----------------------|------------------------------|
| <b>Guide Sequence in red</b> |                       |                              |
| ECM3-sg-scaf-Fw              | TTACAGCTGACCCTTCACTG  | GTTTTAGAGCTAGAAATAGCAAGTTAAA |
| OSM2-sg-scaf-Fw              | TTTCGATTTGGAATTTGACTG | GTTTTAGAGCTAGAAATAGCAAGTTAAA |
| CYB2-sg-scaf-Fw              | TGTGGTGCCATTATTTGTAGT | GTTTTAGAGCTAGAAATAGCAAGTTAAA |
| NCE103-sg-scaf-Fw            | TGTGGTCATACTGATTGTGG  | GTTTTAGAGCTAGAAATAGCAAGTTAAA |
| HCM1-sg-scaf-Fw              | ATAAGAAGGGAGATGTTGGG  | GTTTTAGAGCTAGAAATAGCAAGTTAAA |
| TRY4-sg-scaf-Fw              | TGACGGCAACTTCAC TTCCT | GTTTTAGAGCTAGAAATAGCAAGTTAAA |
| gma.sgRNA.TRY6/F             | TTCTAGGTATGTTATCATTT  | GTTTTAGAGCTAGAAATAGCAAGTTAAA |
| gma.sgRNA.CTN1/F             | AACTTGTAAATGCATATCTCG | GTTTTAGAGCTAGAAATAGCAAGTTAAA |
| gma.sgRNA.PHO84/F            | AAAGATTTCTGTTCTCATTT  | GTTTTAGAGCTAGAAATAGCAAGTTAAA |

Primers to amplify the repair template

|                     |                                                                 |                                                      |
|---------------------|-----------------------------------------------------------------|------------------------------------------------------|
| NAT-ECM3-RT-Fw      | GAAGAATTC TAGAAAAC TAGAAATAATAGAAAGAATACCCACTTTAACTTT           | CACAAACTTTTATTGATTTCTGCAAACCAGTCTAATCACTTGCGGCCGC    |
| NAT-ECM3-RT-Rv      | TGTTCACATAATGTATTATCCGTGTATATTAATTGCTATAATGTTGAATCATCATCCTATAA  | TTTGTGAATTATTATGTGGACCACCTTTGATTGTAAATAG             |
| NAT-OSM2-RT-Fw2     | TTTCATTAAC TACAATCTAATACAATTATATATACATATTTCCAATTGAGTCTTATA      | AAAAC TAAATTAACACTTTTCAACAAGTCTAATCACTTGCGGCCGC      |
| NAT-OSM2-RT-Rv2     | GCCATTAATAAGTTATATGTCATTTTTTAAAAAAATAAATGTATATCTAGTTTTTTTT      | TACACACTAACTAAATACGGACCACCTTTGATTGTAAATAG            |
| NAT-CYB2-RT-Fw      | CCCCAATTGATAAAAAAGCTAACTCTCTATAGTTATTGTTGATTTCTACTACTACTACT     | ATTACATCCTTTATAAAAGTCTAATCACTTGCGGCCGC               |
| NAT-CYB2-RT-Rv2     | ACACCCCTTTTTCCTTTCTAATTGTTTG TAAACTGTAGTCTATATTATAATATTTAACTTC  | CCTTATTTTTATATACTGTTGGACCACCTTTGATTGTAAATAG          |
| NAT-NCE103-RT-Fw    | CCAAAACTATTCTTGTACGACCAGTATCAGTGGCATCACCATCTCAATTGAGGAGAACG     | TTTTCAA AATTAAAGTAAAAACAGTCTAATCACTTGCGGCCGC         |
| NAT-NCE103-RT-Rv    | AAATGACAACAATTATCTAAACCATACGAATATCACC AATATATTTATTATTATTATTATCT | ATAA ACTCTATAAACGGACCACCTTTGATTGTAAATAG              |
| NAT-HCM1-RT-Fw      | TTCTACTTTATATTTAAGAGATAAACCAAAGACACTGAAACA ACTAAGCGAAAAAAAAT    | AATATACCTTTGGATCAAGAGTCTAATCACTTGCGGCCGC             |
| NAT-HCM1-RT-Rv      | AAAAGTGATTTGCCCATTCCCAAAAAAACCAATACCCAGTAACCAAAAATACAAACAC      | CCATGGGCAACAAAAAGAGACACGGACCACCTTTGATTGTAAATAG       |
| NAT-TRY4-RT-Fw      | ACCCCATACTTAATATTAATTATTCATAACCTATTTATTCATTGATTATACAAC TAAAA    | ATTA AAAATACCGAATTACACCAGTCTAATCACTTGCGGCCGC         |
| NAT-TRY4-RT-Rv      | CCCCATGAAAAATATAAATCAATCACAAATCATATTAAGATTAAAAATAAATATTAG       | TTTTGCCAAAAGATTAAAGTTATTGGGACCACCTTTGATTGTAAATAG     |
| gma.NAT.TRY6.rep/F  | TTTCTCAGGTAAACCATCTTTGTATTTGCCCATACCCATATATCTATAGACAGTATTG      | TGTGTTCTTGCCACATATTAATTAGTCTAATCACTTGCGGCCGC         |
| gma.NAT.TRY6.rep/R  | AAAAGGAAATAGTAAATCTAAAAATCGAAATGAAGTTGTCATTA AATGTGAATTC        | CCCAGGGGGTAAAACAAGAAATCCGGACCACCTTTGATTGTAAATAG      |
| gma.NAT.CTN1.rep/F  | TAATTGATTTAAGTACTGGTTTTACTTATTAGTTGAGACAACCTCCATATACATACAT      | ATATATTTACTCCCTCGAAAAGTCTAATCACTTGCGGCCGC            |
| gma.NAT.CTN1.rep/R  | AAATAAATAAATAAATAAATAAAGCTTAACAAAATACATGATCATCAATAAAAC T        | AAAAACTCAAAAGAACAAATTGTTCAATTGGACCACCTTTGATTGTAAATAG |
| gma.NAT.PHO84.rep/F | CTCTTTTGTCTATATCACATTTACAAC TAACTATAGTTTTTACAAAAAGATGGTT        | GCTGAAATTCAARSCTCACACTAAGTCTAATCACTTGCGGCCGC         |
| gma.NAT.PHO84.rep/R | TATAATAAAGTGAAAAAAAATATACAATTA AATTA AATTA AATTAACAAAACAA       | ATCAAACAGATAGAAATGAAAAGGACCACCTTTGATTGTAAATAG        |

PCR Diagnostic Primers

|                |                                 |
|----------------|---------------------------------|
| ECM3-5V-Fw     | CGCATTGATAGTGATGC               |
| ECM3-ORF5-Rv   | GTCCCGACATGTTGAAACTG            |
| ECM3-ORF3-Fw   | GCATTCTACACAGACCCATTAAG         |
| ECM3-3V-Rv     | GTGTACAAATGGTTATGTTG            |
| OSM2-5V-Fw     | CTTCCCCCACACACTCATTC            |
| OSM2-ORF5-Rv   | GATAAAATTGTTCAACCGAATCAGGG      |
| OSM2-ORF3-Fw   | GGAAGAGATGCTACTGAAAGTTTTGC      |
| OSM2-3V-Rv     | GGGGTTAATCTCAAATTAG             |
| CYB2-5V-Fw     | GGAGTCATTTGATAACAAATG           |
| CYB2-ORF5-Rv   | GGTGCCATTATTTGTAGTGGC           |
| CYB2-ORF3-Fw   | GCCATGTCAGGATATGGAGATG          |
| CYB2-3V-Rv     | CTTACTACTCTATTTACTACTATGATCTAC  |
| NCE103-5V-Fw   | ATCCCTTCCATCGTGTTGAC            |
| NCE103-ORF5-Rv | GGAAAATTATTATGATTTCCCTGAAC TAAC |
| NCE103-ORF3-Fw | GAAGAATGAAATTGAAGTTTGGGGG       |
| NCE103-3V-Rv   | GCGATGCAATTGTTATTGTTAAATC       |
| HCM1-5V-Fw     | AACTGTTCACTGCCGTTGC             |
| HCM1-ORF5-Rv   | GCTGATATACTTTCAGGTGGTGTG        |
| HCM1-ORF3-Fw   | GTATGACGATGACGATATGGTTTTCAAG    |
| HCM1-3V-Rv     | GGCTGTGCTTCTAGTGATTAATC         |
| TRY4-5V-Fw     | CCTACCCACCCACTCATATTCC          |
| TRY4-ORF5-Rv   | TGTGGTGGTGCTTGAGG TAG           |
| TRY4-ORF3-Fw   | CTTGACTAATGGATCTGTACCGTC        |
| TRY4-3V-Rv     | CATTCTCCCTACAAAAAGGAGGG         |
| PHO84-5V-Fw    | GGGTTTCCTGCGTATATACATAC         |
| PHO84-ORF5-Rv  | CCATTCCAGTAAACGTATTGTAAC        |
| PHO84-ORF3-Fw  | CTACTGCTCATGGTTTATCTGC          |
| PHO84-3V-Rv    | GACATTTCCCATCACAAAATC           |
| TRY6-5V-Fw     | CATTCTATACTTATCACGCACG          |
| TRY6-ORF5-Rv   | GCCGGAAACCTCTATTATGG            |
| TRY6-ORF3-Fw   | GTGAATTCAGGTAGTGCAAG            |
| TRY6-3V-Rv     | CTATCTAAAGGGTGTCTTCAAC          |
| CTN1-5V-Fw     | CTCCTTCAAATCTCCCGCCC            |
| CTN1-ORF5-Rv   | CAACGGGGGAATCATAATTC            |
| CTN1-ORF3-Fw   | GGTTATGGATATTTTGATATGGGCG       |
| CTN1-3V-Rv     | CTGTCTTTTTGCAGCCGTCAC           |
| NAT-5V-Rv      | tataaatagcacacccac              |
| NAT-3V-Fw      | gtactggtactggttctcgg            |
